1 **Title: Spatiotemporal structure of sensory-evoked and spontaneous activity revealed by**  
2 **mesoscale imaging in anesthetized and awake mice**

3  
4

5 **Authors:** Navvab Afrashteh<sup>1,3</sup>, Samsoun Inayat<sup>1,3</sup>, Edgar Bermudez Contreras<sup>1,3</sup>, Artur Luczak<sup>1</sup>,  
6 Bruce L. McNaughton<sup>1,2</sup>, Majid H. Mohajerani<sup>1\*</sup>

7 <sup>1</sup>University of Lethbridge, Faculty of Arts and Sciences, Department of Neuroscience, 4401  
8 University Dr. W., Lethbridge, Alberta, Canada, T1K 3M4.

9 <sup>2</sup>Center for Neurobiology of Learning and Memory, Department of Neurobiology and Behavior,  
10 University of California, Irvine.

11 <sup>3</sup>These authors contributed equally.

12 \* Corresponding author: Majid H. Mohajerani (mohajerani@uleth.ca)

13

14

15

16

17

18

19

20

21

22

23

24

## 1 **Abstract**

2 Brain activity propagates across the cortex in diverse spatiotemporal patterns, both as a response  
3 to sensory stimulation and during spontaneous activity. Despite been extensively studied, the  
4 relationship between the characteristics of such patterns during spontaneous and evoked activity  
5 is not completely understood. To investigate this relationship, we compared visual, auditory, and  
6 tactile evoked activity patterns elicited with different stimulus strengths and spontaneous activity  
7 motifs in lightly anesthetized and awake mice using mesoscale wide-field voltage-sensitive dye  
8 and glutamate imaging respectively. The characteristics of cortical activity that we compared  
9 include amplitude, speed, direction, and complexity of propagation trajectories in spontaneous and  
10 evoked activity patterns. We found that the complexity of the propagation trajectories of  
11 spontaneous activity, quantified as their fractal dimension, is higher than the one from sensory  
12 evoked responses. Moreover, the speed and direction of propagation, are modulated by the  
13 amplitude during both, spontaneous and evoked activity. Finally, we found that spontaneous  
14 activity had similar amplitude and speed when compared to evoked activity elicited with low  
15 stimulus strengths. However, this similarity gradually decreased when the strength of stimuli  
16 eliciting evoked responses increased. Altogether, these findings are consistent with the fact that  
17 even primary sensory areas receive widespread inputs from other cortical regions, and that, during  
18 rest, the cortex tends to reactivate traces of complex, multi-sensory experiences that may have  
19 occurred in a range of different behavioural contexts.

20

21 **Keywords:** wide-field optical imaging, cortical states, sensory-evoked activity, spontaneous  
22 activity, optical flow analysis, activity propagation speed, direction, trajectories

23

## 1 **1 Introduction**

2 Much of the development of our current understanding of sensory processing comes from the study  
3 of evoked activity and the stimulus-response relationships at different stages in the nervous system  
4 (Seung and Sompolinsky, 1993; Butts and Goldman, 2006; Jones and Smith, 2014). However, in  
5 the absence of stimuli the cortex remains active, even in the primary sensory areas. Until not long  
6 ago, spontaneous activity used to be regarded by some as ‘noise’ (Parga and Abbott, 2007; Faisal  
7 et al., 2008; Stringer et al., 2016). However, this view has been steadily replaced by the idea that  
8 spontaneous activity is crucial for the understanding of cortical function (McCormick, 1999;  
9 Ringach, 2009; Raichle, 2010; Deco et al., 2013).

10 Despite significant advances in the understanding of cortical processing underlying both  
11 spontaneous and evoked activity, their relationship and interactions remain under debate. In some  
12 studies, the spatiotemporal patterns of evoked and spontaneous activity are reported to be similar  
13 (Hoffman and McNaughton, 2002; Kenet et al., 2003; Han et al., 2008; Luczak et al., 2009; Berkes  
14 et al., 2011), while in others they are reported to have remarkable differences (Stringer et al., 2019).  
15 For example, at the microcircuit level, Luczak and colleagues proposed that the temporal patterns  
16 of tone-evoked spiking activity occur as part of a larger set of patterns produced during  
17 spontaneous activity recorded using silicon probes within auditory cortex in anesthetized rats  
18 (Luczak et al., 2009; Luczak et al., 2015). In contrast, more recent studies using large-scale high-  
19 density optical imaging as well as silicon probes to record the single-unit activity of large neuronal  
20 populations, report that the patterns of activity from evoked responses belong to a different space  
21 from the ones in spontaneous activity (Stringer et al., 2019).

22 At the mesoscale level, there are reported similarities in the characteristics of evoked and  
23 spontaneous activities. For example, Arieli et al., 1995 stated that the amplitude of the ongoing

1 spontaneous activity was similar to the one in evoked responses in a portion of the anesthetized  
2 cat visual cortex (Arieli et al., 1995). Moreover, Kenet et al., 2003 suggested that spontaneous  
3 activity patterns are similar to the orientation maps observed in visually evoked responses in  
4 anesthetized cats (Kenet et al., 2003). More recently, it has been shown that these maps emerge  
5 only in anaesthetized states but not in awake states (Omer et al., 2019). Similarly, Han et al., 2008  
6 showed that the propagation patterns of spontaneous activity resembles recent sensory-evoked  
7 patterns when measured in a portion of the visual cortex in anesthetized rats (Han et al., 2008). At  
8 the macro-scale level, the fluctuations of the BOLD signal in functional magnetic resonance  
9 imaging (fMRI) in humans has been reported to be larger during spontaneous activity (resting  
10 state) than during task-driven activity (He, 2011; Ponce-Alvarez et al., 2015; Ito et al., 2019).

11 Some of the contradictory results on the relationship between evoked and spontaneous  
12 activity in previous studies can be explained by methodological differences. For example, these  
13 studies used different animal models, which can affect certain characteristics of cortical processing  
14 (e.g. theta oscillations in humans are significantly slower than in rodents) (Alloway et al., 1993;  
15 Jacobs, 2014). Moreover, the recording techniques used in these studies have important intrinsic  
16 differences in spatial and temporal resolutions, which in turn might impact the measurements to  
17 compare evoked and spontaneous activity (Menon and Kim, 1999). Furthermore, there is also wide  
18 diversity in the preparations used in these studies, such as brain slices or *in vivo* recordings, which  
19 have distinct activity dynamics and might impact the conclusions (Azzarelli et al., 2017). Also, the  
20 brain states in which the recordings were performed might be different. For example, the cortical  
21 dynamics of anesthetized or sleeping animals have remarkable differences to the ones from awake  
22 or desynchronized brain states (Sellers et al., 2015). Finally, the sensory modalities from which  
23 the brain activity was recorded from might not be directly comparable. For example, it is known

1 that locomotion can modulate evoked responses in auditory and visual cortices in opposite  
2 directions (Niell and Stryker, 2010; McGinley et al., 2015; Yang et al., 2020).

3 In this study, we used VSD and glutamate mesoscale wide-field imaging of most of the right  
4 cerebral hemisphere in lightly anesthetized and awake mice, respectively to evaluate whether the  
5 complexity of cortical activity patterns was different during spontaneous and evoked activity.  
6 Optical flow and fractal dimension analyses were used to characterize and compare the  
7 spatiotemporal dynamics of sensory-evoked activity to motifs of spontaneous activity that  
8 originate in the same cortical region using evoked activity-derived template matching (Mohajerani  
9 et al., 2013; Afrashteh et al., 2017). Overall, this technique offers the possibility of monitoring  
10 activity over large portions of the cortical mantle at high spatiotemporal resolution which, in turn,  
11 permits the application of methods to characterize the cortical activity dynamics in both regimes.  
12 In contrast with previous studies, we used different sensory modalities (tactile, auditory, and  
13 visual), several stimulation strengths, and brain states, which provide a more complete comparison  
14 of ongoing and evoked cortical activity.

15 We found that the response amplitude, propagation speed, and extent of propagation of the  
16 evoked activity has a positive correlation with the stimulus intensity. The speed, direction stability,  
17 and extent of propagation of spontaneous activity was also positively correlated with the  
18 amplitude. Our results demonstrate that, for the above-mentioned parameters, sensory-evoked  
19 responses at low stimulus strengths are similar to motifs of spontaneous activity and that this  
20 similarity diminishes as stimulus strength increases. Motifs were defined as spatiotemporal  
21 patterns within spontaneous activity that matched spatiotemporal templates constructed from  
22 sensory evoked responses. Finally, we showed that the repertoire of directions and trajectories of  
23 propagation of sensory-evoked activity is smaller than the one from spontaneous activity.

## 1    2    **Materials and Methods**

### 2    *2.1 Animals and Surgery*

3    Animal housing, surgery, and all experimental protocols were approved by the University of  
4    Lethbridge Animal Care Committee in line with the guidelines from the Canadian Council for  
5    Animal Care. For anesthetized preparations, adult male and female C57BL/6J mice (n=5 animals  
6    for forelimb and hindlimb stimulation experiments and n=4 animals for visual stimulation  
7    experiments) around ~3 months of age and weighing approximately 25g were used. Mice were  
8    anesthetized with isoflurane (1.0–1.5%) for induction and during surgery, and a reduced  
9    concentration during data collection (0.5–1.0%). A 7 × 6 mm unilateral craniotomy (bregma +2.5  
10    to -4.5 mm, lateral to the midline 0 to 6 mm) was made, and the dura was removed, as described  
11    previously (Kyweriga and Mohajerani, 2016). The body temperature was maintained at 37°C  
12    during surgeries and subsequent imaging sessions. For awake preparations, n=5 adult mice (2  
13    males and 3 females) Ai85-CamKtTA-EMX1-Cre (cross of B6; 129S-Igs7tm85.1 (tetO-  
14    gltI/GFP\*) Hze/J and B6.129S2-Emx1tm1(cre)Ktj/J) with 5–8 months of age and weighing  
15    approximately 26g were used. These mice express intensity-based glutamate sensing fluorescent  
16    reporter (iGluSnFR) in excitatory neurons and glial cells of cortex (Xie et al., 2016; Karimi  
17    Abadchi et al., 2020). One week prior to performing wide-field glutamate imaging, a surgery was  
18    done to expose the cranial bone and for implanting a head-plate. A large portion of the cranial  
19    bone was exposed by removing the skin. The cranial bone was then cleaned and metabond was  
20    applied on top. Finally, a glass coverslip was placed on top to keep the surface clear from  
21    accumulating debris from the animal's home cage and the environment.

## 1 2.2 *Data acquisition*

### 2 2.2.1 *Wide-field optical imaging*

3 Wide-field optical imaging of summated cortical synaptic or voltage activity was utilized to  
4 capture the mesoscale dynamics of the cortex in both anesthetized and awake preparations. For  
5 voltage-sensitive dye imaging in anesthetized mice, the dye RH-1691 (Optical Imaging, New  
6 York, NY) (Shoham et al., 1999), was dissolved in HEPES-buffered saline solution (0.5 mg/ml)  
7 and applied to the exposed cortex for 30-40 min, as described previously (Mohajerani et al., 2010;  
8 Mohajerani et al., 2011; Lim et al., 2012; Lim et al., 2013). The unabsorbed dye was carefully  
9 washed out and the brain was covered with 1.5% agarose in HEPES-buffered saline solution and  
10 sealed with a glass coverslip. VSD was excited using a red LED (627 nm center, Luxeon Star  
11 LEDs Quadica Developments Inc., Alberta, Canada) and excitation filter (630±15 nm, Semrock,  
12 New York, NY). The VSD signal was passed through an emission filter (688±15 nm, Semrock,  
13 New York, NY). Images were taken through a macroscope composed of front-to-front pair of  
14 video lenses (8.6×8.6 mm field of view, 67 μm per pixel). The focal plane of the camera was 0.5–  
15 1 mm below the cortical surface. The images were captured by a 12-bit charge-coupled device  
16 (CCD) camera (1M60 Pantera Dalsa, Waterloo, ON) and an EPIX E8 frame grabber with XCAP  
17 3.8 imaging software (EPIX, Inc., Buffalo Grove, IL) at 150 Hz frame rate. For glutamate imaging,  
18 iGluSnFR was excited using a blue LED (470nm center, Luxeon Star LEDs Quadica  
19 Developments Inc., Alberta, Canada) filtered through an excitation filter (470±20nm, Semrock,  
20 New York, NY). The fluorescent signal emitted from cortical activity was collected after passing  
21 through an emission filter (542±27nm). Images were taken with the same macroscope camera as  
22 described above.

### 1 2.2.2 Recording of spontaneous and evoked activity

2 For anesthetized preparations, spontaneous activity was recorded for at least 20 mins prior  
3 to recording evoked activity as sensory stimulation could alter the characteristics of spontaneous  
4 activity (Han et al., 2008). To electrically stimulate left forelimb and hindlimb paws, a thin needle  
5 (0.14 mm) was inserted into the ventral surface of each paw. Different levels of current were  
6 presented in ascending order to stimulate the paws for 1ms duration (0.01 to 1.5mA;  
7 Supplementary Fig. SM1A). The stimulation intensities were categorized into three classes: low  
8 (Lo), medium (Med), and high (Hi) strength as follows: the low and high stimulation levels were  
9 identified as the minimum levels that evoke a detectable VSD response and a saturated response,  
10 respectively. The medium stimulation level was a level between low and high stimulation levels  
11 that generated a response with clear distinction from low and high responses (Supplementary Fig.  
12 SM1A). A 1-ms pulse of combined blue and green light was used as visual stimulation. For fore  
13 and hind paw stimulation, 10–20 trials of each stimulation intensity level were given with an  
14 interstimulus interval of 10s. For visual stimulation experiments, VSD response distributions were  
15 calculated from 100–200 trials of stimulation with an interstimulus interval of 10s.

16 For awake preparations, spontaneous activity was recorded similarly as described above.  
17 Evoked activity was recorded by presenting a tone of 12 kHz frequency for a duration of 50ms.  
18 The sound levels for Lo and Hi stimulation levels were 40 and 80 dB SPL respectively. 10-20 trials  
19 of stimulation were presented with an intertrial interval of 10-12s. Tones were generated using a  
20 Tucker-Davis Technologies Inc. (TDT, Alachua, FL, USA) RX6 processor and delivered to  
21 animal's left ear via a free-field ES1 (TDT Inc.) speaker.



## 1    2.3 Data analysis

### 2    2.3.1 Data preprocessing

3       All preprocessing was done in Matlab® (Mathworks, Natick, MA, USA). To do fair  
4    comparisons between evoked responses and spontaneous activity, all recordings (image frames)  
5    were treated using similar preprocessing procedures. As staining of non-flat cortical surface with  
6    voltage-sensitive dye is likely non-uniform, a regional bias in the captured signal is possible. To  
7    overcome this bias, the signal was normalized to a baseline ( $\Delta F/F_0$ ). The baseline was estimated  
8    for both, no-stimulation trials and spontaneous activity, using the “locdetrend” function from the  
9    Chronux toolbox (Bokil et al., 2010). The  $\Delta F/F_0$  time series of the VSD signal was then filtered  
10   with a zero-phase lag Gaussian low-pass filter (6 dB attenuation at 25 Hz frequency) while the  
11   glutamate signal was filtered with 6 Hz low-pass filter to eliminate the effects of hemodynamics  
12   that appears at 8-14 Hz. At the end, a two-dimensional spatial Gaussian filter ( $\sigma \approx 67 \mu m$ ) was  
13   applied. Each evoked response trial was preprocessed separately and then averaged to get the  
14   average response of the corresponding cortical activation and stimulation level.

### 15   2.3.2 Optical flow analysis

16       To capture the spatiotemporal dynamics of VSD and glutamate recordings, we used the  
17    Combined Local-Global (CLG) method implemented in Optical-Flow Analysis Toolbox  
18    (Afrashteh et al., 2017). Using this method, velocity vector fields were estimated for each time  
19    point. For each pixel in a frame, we calculated a velocity vector that depicts the instantaneous  
20    speed and direction of activity propagation.

### 1 2.3.3 *Identification of spontaneous activity motifs*

2 For anesthetized mice, spontaneous activity patterns were compared to patterns of evoked activity  
3 in the primary forelimb somatosensory (FLS1), hindlimb somatosensory (HLS1), and visual  
4 cortices (VC) while for awake mice, similar comparisons were done for activity in the auditory  
5 cortex (AC). Motifs of spontaneous activity were identified using the template matching method  
6 used in (Mohajerani et al., 2013). Briefly, for each sensory modality the template was defined as  
7 the set of three frames after the onset of the evoked activity elicited by Hi stimulus level  
8 (Supplementary Fig. SM1B). Then, we calculated the Pearson correlation coefficients (PCC)  
9 between these templates and spontaneous activity (Fig. SM1C and D). Frames of spontaneous  
10 activity with a PCC greater than a given threshold were considered to be a ‘match’ to the evoked  
11 templates. To determine the threshold value, the maximum of PCC between all sensory templates  
12 (hindlimb, forelimb, visual, auditory and whisker) were measured, and the results were multiplied  
13 by a constant factor (1.34) (Mohajerani et al., 2013). The consecutive events with PCC peaks above  
14 given threshold were also screened to be separated by at least 100msec. Frames around these time  
15 points were then selected as spontaneous activity events or motifs. To determine the onset of a  
16 spontaneous activity motif, local minima were found within 50 frames around the PCC peak and  
17 fitted with a cubic polynomial curve (as shown in supplementary Fig. SM2A). The onset of a  
18 spontaneous activity motif was considered one frame prior to the intersection of the fitted curve  
19 and the original signal. We validated this methodology by estimating stimulus onsets for all trials  
20 of evoked activity and comparing with actual values. Most of the differences between estimated  
21 and actual onsets were close to 0 (supplementary Fig. SM2B, SM2C, SM2D). The estimation was  
22 less accurate for glutamate imaging (supplementary Fig SM2E). For all subsequent analyses,  
23 “estimated” onsets for both evoked and spontaneous activity were used. To determine the

1 trajectory of the activity we needed to determine the end of such activity. For this, we considered  
2 the activity peak as end point since after this frame the activity starts to diminish. Note that for  
3 finding the spontaneous motifs in the forelimb and hindlimb regions, the threshold value for  
4 finding PCC peaks (see above) was defined individually for each animal as the mean PCC between  
5 forelimb and hindlimb-evoked activity (first three frames) for all stimulus intensities (total 9  
6 values). If the mean PCC value was less than 0.4, 0.4 threshold value was used.

#### 7 *2.3.4 Measurement of amplitude, time-to-peak, and propagation speed and direction*

8 To determine characteristics of evoked and spontaneous activity such as amplitude, and time-to-  
9 peak, speed and direction in a cortical area (e.g. FLS1, HLS1, VC, or AC), a region-of-interest  
10 (ROI) was first defined and time series of  $\Delta F/F_0$  for all pixels within the ROI were averaged to  
11 obtain one  $\Delta F/F_0$  time series which was used in subsequent analyses. A ROI was defined as the  
12 area for which  $\Delta F/F_0$  values are above the mean+SD of all  $\Delta F/F_0$  values in that frame. The center  
13 of the PTA ROI was located anatomically as -2mm anterior-posterior and +1.5mm lateral from the  
14 bregma and with the size of  $0.5 \times 1 \text{mm}^2$ . To calculate the amplitude of sensory-evoked responses,  
15 the mean of the baseline was subtracted from the maximum of  $\Delta F/F_0$  values within the first 10  
16 frames (67ms for VSD and 100ms for glutamate experiments) after stimulus onset. Similarly, to  
17 calculate the amplitude of spontaneous activity motifs, the mean of baseline activity was subtracted  
18 from the peak  $\Delta F/F_0$  within  $\pm 15$  frames around the peak PCC used for identifying a motif (see  
19 above). For both evoked and spontaneous activity, the baseline was considered as  $\Delta F/F_0$  of 10  
20 frames before the onset of activity. The time-to-peak was calculated as the time of the peak minus  
21 the time of the estimated activity onset.

22 To calculate the propagation speed and direction of the activity from the optical flow analysis, we  
23 averaged the velocity vectors of all pixels in each ROI for each time frame. Speed and direction of

1 propagation were then determined from the velocity vector with the largest magnitude after the  
2 estimated activity onset and within  $\pm 15$  frames around the peak of  $\Delta F/F_0$  signal. For determining  
3 how stable the directions of propagation were for a spontaneous activity motif, we defined the  
4 propagation direction stability (Figures 7 and S7) and calculated as follows. First, for each frame,  
5 we calculated the cosine of the angles between the average velocity vector at peak speed and the  
6 average velocity vectors in the frames before and after such frame ( $\pm 6$  and  $\pm 10$  frames around the  
7 peak speed frame for VSD and glutamate imaging respectively). Then, we used the average cosine  
8 value to estimate how similar the directions of propagation of the motif to its direction at peak  
9 speed were. Therefore, the propagation direction stability measured this way has values between -  
10 1 and 1 with values closer to 1 indicating that on average, the direction of propagation of  
11 spontaneous activity motif was similar to its direction at peak speed.

### 12 *2.3.5 Determination of propagation trajectories/paths of activity*

13 To compare the propagation of sensory-evoked and spontaneous activity motifs, trajectories were  
14 calculated starting from the onsets of activity to temporal locations of their peak amplitude (Fig.  
15 SM2F). To estimate the activity trajectory, we first determined the extent of activity (i.e. onset and  
16 offset) and its centroid for each frame using contours identified by  $\Delta F/F_0$  values above mean +  
17  $m \times SD$  of all  $\Delta F/F_0$  values in that frame. The value of “m” was 0.6 and 0.5 for the first and  
18 subsequent frames respectively. Next, one spatial point was selected in each frame to represent the  
19 “location of activity” in that frame. The trajectory of the activity propagation was then defined as  
20 the sequence of such activity locations across frames. In the first frame, the centroid of the activity  
21 contour was selected as the “location of activity”. For all subsequent frames, the location of activity  
22 was defined as the intersection of the contour line and the extrapolated directional vector joining

1 the centroid of activity in the previous frame to centroid of activity in the current frame (Fig.  
2 SM2F).

### 3 *2.4 Statistical Analysis*

#### 4 *2.4.1 Statistical Tests*

5 All statistical analyses were done in Matlab®. Paired sample t-test, Wilcoxon rank sum test, or  
6 repeated measures ANOVA with Greenhouse-Geisser adjustment for the potential lack of  
7 sphericity and post-hoc Tukey-Kramer correction for multiple comparisons were used. We report  
8 F-values, p-values and the estimates of the effect size (partial  $\eta^2$ ). Also, in Figures 7 and S7 we  
9 fitted a linear regression model to each of the scatter plots. The linear model coefficients and their  
10 p-values are reported. The type of test used is indicated in the text as well as in figure captions.  
11 Error bars represent the standard error of mean (SEM). \*, \*\*, and \*\*\* indicate significance levels  
12 of  $p < 0.05$ ,  $p < 0.01$ , and  $p < 0.001$  respectively.

#### 13 *2.4.2 Bootstrap Method to generate Distributions of Hausdorff Fractal Dimension*

14 The Hausdorff fractal dimension measures the roughness (complexity) of a trajectory path.  
15 Trajectories that occupy larger space exhibit higher fractal dimension (Singh et al., 2016). We  
16 determined the Hausdorff fractal dimensions using the box counting method for each trajectory  
17 heat map which encode the percentage of the number of activity that passed through a certain point  
18 on the cortical surface. The heat maps were first binarized using Otsu's method (Otsu, 1979) before  
19 determining fractal dimensions. For each animal and stimulus type (e.g. forelimb stimulation), we  
20 generated a distribution of Hausdorff fractal dimension using bootstrapping over trials from all  
21 levels of stimulus strength. Once we calculated these distributions over all trials from all stimulus  
22 levels, we calculated the trajectory for each stimulation trial. At each iteration of this bootstrapping

1 method, we randomly selected the corresponding trajectories of 10 trials and their average  
2 trajectory was used to represent the trajectory in this condition. Then, we calculated the fractal  
3 dimension for the average trajectory. This process was done 500 times and we estimated the  
4 probability density function (PDF) of the calculated fractal dimension. Analogously, we used the  
5 same procedure to estimate the PDF of spontaneous motifs for each animal and stimulus-type  
6 motifs.

### 7 **3 Results**

#### 8 *3.1 Response amplitudes of sensory-evoked cortical activity are larger than the amplitudes of* 9 *motifs of spontaneous cortical activity in both anesthetized and awake mice*

10 We investigated how changes in stimulus strength affect the amplitude of sensory-evoked activity  
11 and compared it with amplitudes of spontaneous activity events or motifs (see Methods). In  
12 previous studies (Petersen et al., 2003b; MacLean et al., 2005; Han et al., 2008; Luczak et al.,  
13 2009), the amplitude of spontaneous activity was found to be comparable to the amplitude of  
14 evoked responses. Works on the topographic organization and processing characteristics of  
15 different sensory cortices using fMRI, electrophysiology, and optical imaging (Jancke et al., 1998;  
16 Shoham et al., 1999; Spenger et al., 2000; Petersen et al., 2003a; Ferezou et al., 2007; Polley et al.,  
17 2007; Guo et al., 2012), suggested that increasing the stimulus intensity induces a larger response  
18 amplitude at the neuronal network level. Here, we revisited the study of the the relation between  
19 the amplitude of spontaneous motifs and evoked activity elicited by multiple stimulus strengths to  
20 clarify this discrepancy in both, anesthetized and awake animals.

21 We used voltage-sensitive dye (VSD) imaging in anesthetized mice and modeled different levels  
22 of somatosensory stimulation by injecting several different electrical current levels, low (Lo),

1 medium (Med) and high (Hi), to the fore and hind paws. Different level of stimuli strength used  
2 here may mimic the statistics of the sensory input experienced by animals during natural behaviour  
3 (Simoncelli, 2003; Carriot et al., 2017). Anaesthesia provided a long-lasting, stable baseline brain  
4 state that was free of active behaviours and voluntary mental processes that may contaminate the  
5 analysis of purely spontaneous activity from which to make our observations (Musall et al., 2019;  
6 Stringer et al., 2019). We measured evoked cortical responses in the contralateral cerebral  
7 hemisphere for multiple trials of forelimb or hindlimb stimulation. We also recorded spontaneous  
8 activity and identified events which were similar to patterns of cortical activation elicited by  
9 forelimb and hindlimb stimulation. These spontaneously occurring motifs were determined using  
10 a template matching method with the templates extracted from evoked responses elicited by Hi  
11 forelimb and hindlimb stimulus strength (see Methods & Supplemental Fig. SM1 B-D). Using this  
12 approach, we identified the spontaneous activity motifs originated in the primary fore or hindlimb  
13 somatosensory (FLS1 or HLS1) cortices (top rows in Fig. 1A and S1A) and propagated following  
14 different trajectories on the cortical surface. Sensory-evoked activity increased in amplitude and  
15 spread when stimulus intensities were increased (Fig. 1A and supplementary Fig. S1A). For low  
16 level forelimb and hindlimb stimuli, the response was local to the forelimb and hindlimb areas of  
17 the primary and secondary somatosensory cortices respectively, while for medium and high  
18 stimuli, the spatial extent of the evoked response was larger than the primary forelimb and  
19 hindlimb somatosensory areas. Moreover, for forelimb stimuli, after an initial expansion of the  
20 evoked response in the FLS1 area, activity traveled in the medio-caudal direction passing through  
21 the HLS1 area (Fig 1A). Similarly, the spread of the initial hindlimb-evoked response increased  
22 with stronger stimuli (supplementary Fig. S1A).

1 For a quantitative analysis, we first determined the average value of the VSD signal over time in  
2 an ROI (FLS1 or HLS1) by finding the mean  $\Delta F/F_0$  for all pixels within an ROI at each time point.  
3 In this way, time series of VSD signals for an ROI were determined for all trials of evoked activity  
4 and for all motifs of spontaneous activity. The average over trials (evoked-activity) and motifs  
5 (spontaneous activity) for all animals ( $n = 5$ ) of these VSD signals is shown in Fig. 1B for FLS1  
6 ROI (supplementary Fig. S1B for hindlimb stimulation and HLS1 ROI). It is quite evident that  
7 motifs of spontaneous activity have the lowest  $\Delta F/F_0$  values while these values increase with  
8 increasing stimulus levels for evoked activity. Next, we calculated the amplitudes of these signals  
9 by subtracting the mean value over the baseline from the peak  $\Delta F/F_0$  (see Fig. 1B) and observed  
10 that the amplitudes of evoked activity increased with the intensity of the stimulus (Fig. 1B-C, and  
11 S1B-C). Note that the mean amplitudes of spontaneous activity motifs were similar to those of  
12 evoked activity elicited with Lo stimulus levels while they were significantly smaller than  
13 amplitudes of evoked activity elicited with Med and Hi stimulus levels (Fig. 1D for forelimb,  
14 repeated measures ANOVA: F-value = 29.075921,  $p = 0.0000086849$ ,  $\eta^2 = 0.879066$ ; post-hoc:  
15 spontaneous vs Med  $p = 0.018772$ , spontaneous vs Hi  $p = 0.0059376$ ; Fig. S1D for hindlimb,  
16 repeated measures ANOVA: F-value = 27.93219,  $p = 0.0000107044$ ,  $\eta^2 = 0.874735$ ; post-hoc:  
17 spontaneous vs Med  $p = 0.048948$ , spontaneous vs Hi  $p = 0.011894$ ). We also quantified the time-  
18 to-peak (time from stimulus onset to the VSD signal maximum) and found that spontaneous  
19 activity motifs were the slowest to reach their peak levels as compared to responses of evoked  
20 activity (Fig. 1E for forelimb, repeated measures ANOVA: F-value = 20.520079,  $p =$   
21  $0.0000512563$ ,  $\eta^2 = 0.836868$ ; post-hoc: spontaneous vs Lo  $p = 0.0051397$ , spontaneous vs Med  
22  $p = 0.0067666$ , spontaneous vs Hi  $p = 0.011896$ ; Fig. S1E for hindlimb, repeated measures  
23 ANOVA: F-value = 8.992695,  $p = 0.0021416665$ ,  $\eta^2 = 0.692135$ ; post-hoc: spontaneous vs Hi  $p$



1 = 0.038979). In a separate cohort of anesthetized mice ( $n = 4$ ), we also compared the amplitudes  
2 and time-to-peak of visual evoked activity (elicited with only one stimulus level) with those of  
3 visual motifs in spontaneous activity (supplementary Fig. S2). The mean amplitude of evoked  
4 activity was significantly larger than that of spontaneous activity events (Fig. S2D, paired sample  
5 t-test  $p = 0.012257$ ). The time-to-peak for evoked activity was significantly smaller than that for  
6 visual motifs in spontaneous activity (Fig. S2E, paired sample t-test  $p = 0.0078674$ ).

7 To compare the amplitudes and temporal dynamics of sensory-evoked and spontaneous activity in  
8 the awake brain state, we used glutamate (Glu) imaging and auditory stimulation with two levels  
9 of sound volume (Lo and Hi). The preprocessing to find Glu  $\Delta F/F_0$  values was done in a similar  
10 fashion as for VSD imaging except that Glu signal was filtered using a bandpass filter (see  
11 methods). Spontaneous activity motifs were also determined in a similar fashion as described  
12 above for VSD imaging. The auditory-evoked response originated in the primary auditory cortical  
13 region (AC) and expanded into other cortical regions (montage Fig. 2A). The Glu signal was the  
14 largest for evoked response elicited by Hi stimulus level. The average Glu signal (Fig. 2B; average  
15 over ROI pixels, trials, and animals) was also the largest for evoked activity elicited by Hi stimulus  
16 level. However, average Glu signals for evoked activity elicited by Lo stimulus level was  
17 comparable to average Glu signal for spontaneous activity motifs. Next, we compared the  
18 amplitudes of the Glu signal in a similar way as for VSD signal. The amplitudes of auditory motifs  
19 in spontaneous activity were significantly smaller than those of evoked activity elicited with Hi  
20 stimulus levels (Fig. 2C-D, repeated measures ANOVA: F-value = 19.906767,  $p = 0.0007837121$ ,  
21  $\eta^2 = 0.832683$ ; post-hoc: spontaneous vs Hi  $p = 0.0040670$ ) but were similar to those elicited by  
22 Lo stimulus level ( $p = 0.93913$ ). The time-to-peak for motifs of spontaneous activity was  
23 significantly larger than the time-to-peak for responses of evoked activity with Hi and Lo auditory

1 stimulus levels (Fig. 2E, repeated measures ANOVA: F-value = 201.184997,  $p = 0.0000001444$ ,  
2  $\eta^2 = 0.980505$ ; post-hoc: spontaneous vs Lo  $p = 0.00024736$ , spontaneous vs Hi  $p = 0.00030659$ ).  
3 These results, from both anesthetized and awake preparations, thus suggest that the amplitudes of  
4 spontaneous activity motifs are smaller than those of evoked activity and their temporal dynamics  
5 is slower.

### 6 *3.2 The propagation speed of sensory-evoked cortical activity is larger than that of motifs of* 7 *spontaneous cortical activity in anesthetized and awake mice*

8 We next investigated how stimuli of different strengths affects the speed of propagation of evoked  
9 activity waves on the cortical surface and whether the speeds of sensory-evoked activity are larger  
10 than those of spontaneous activity. Given that, behaviorally, animals must attend to salient stimuli  
11 for survival (Corbetta et al., 2008), we hypothesized that the propagation speeds of sensory-evoked  
12 activity would increase with highly salient stimuli and will be higher than the speeds of  
13 spontaneous activity. To address these questions, we quantified the propagation speed of sensory-  
14 evoked activity for forelimb and hindlimb modalities in anesthetized mice with VSD imaging.  
15 Similarly, we quantified the speed of auditory evoked responses in awake mice with glutamate  
16 imaging. To determine velocity vector fields on VSD and glutamate imaging recordings, we  
17 applied optical flow analysis (Afrashteh et al., 2017) to obtain the instantaneous speed and  
18 direction of propagation (Fig. 3A).

19 For anesthetized mice and somatosensory modalities (forelimb and hindlimb), the instantaneous  
20 speeds increased with stronger stimuli (Fig. 3A and S3A). Instantaneous speeds for forelimb motifs  
21 in spontaneous activity and for responses elicited by Lo stimulus strength, however, were very  
22 small (notice different scale factors used for plotting velocity vector fields in first column in Fig.  
23 3A and S3A). Furthermore, we calculated the average speed over time by finding the magnitude

1 of the vector sum of the velocity vectors of all pixels within an ROI (e.g. FLS1 or HLS1) for each  
2 time point calculated over the average response of all trials. The average over animals ( $n = 5$ ) was  
3 then determined and shown in Fig. 3B for FLS1 ROI (and in supplementary Fig. S3B for hindlimb  
4 stimulation and HLS1 ROI). The average speeds were the lowest for spontaneous activity motifs  
5 and increased with increasing stimulus levels for evoked activity. The peak speeds in the  
6 corresponding ROIs were also determined from the time series of average speeds. The distributions  
7 of these peak speeds are shown in Fig. 3C (and in supplementary Fig. S3C for hindlimb  
8 stimulation). Motifs of spontaneous activity had peak speeds similar to those of responses of  
9 evoked activity elicited with Lo stimulus strength. The speeds increased with increasing stimulus  
10 levels (Fig. 3C and 3D) in the FLS1 ROI. The mean peak speed of evoked activity elicited by Hi  
11 and Med stimulus strength was significantly larger than the mean peak speed of evoked activity  
12 elicited by Lo stimulus strength (Fig. 3D, repeated measures ANOVA: F-value = 9.226881,  $p =$   
13  $0.0019301139$ ,  $\eta^2 = 0.697586$ ; post-hoc: Med vs Lo  $p = 0.012693$ , Hi vs Lo  $p = 0.036275$ ). Since  
14 forelimb evoked activity elicited by Med and Hi stimulus levels originated in the FLS1 ROI but  
15 traveled in the medio-caudal direction on the cortical surface, we also compared propagation  
16 speeds in the HLS1 and posterior tegmental area (PTA) (posterior parietal cortex) ROIs. The  
17 difference in speeds of sensory-evoked with Med and Hi stimulus strengths and spontaneous  
18 activity was significant in the HLS1 and PTA ROIs (Fig. 3E for HLS1, repeated measures  
19 ANOVA: F-value = 19.027242,  $p = 0.0000743228$ ,  $\eta^2 = 0.826293$ ; post-hoc: Med vs spontaneous  
20  $p = 0.0068222$ , Hi vs spontaneous  $p = 0.036175$ ; 3F for PTA, repeated measures ANOVA: F-value  
21 = 14.780107,  $p = 0.0159957714$ ,  $\eta^2 = 0.787009$ ; post-hoc: Med vs spontaneous  $p = 0.041526$ , Hi  
22 vs spontaneous  $p = 0.038762$ ). Also, for HLS1 and PTA ROIs the mean speed for Med and Hi  
23 strength of sensory forelimb stimulation is significantly higher than the mean speed of propagation

1 for Lo stimulus level (Fig. 3E for HLS1, Med vs Lo  $p = 0.0062288$ , Hi vs Lo  $p = 0.018329$ ; 3F for  
2 PTA, Med vs Lo  $p = 0.017250$ , Hi vs Lo  $p = 0.036929$ ). For hindlimb stimulation also similar  
3 trend is observed in which Hi stimulus level evokes significantly larger speed compared to Lo and  
4 Med stimulus strength and spontaneous activity in all three ROIs (Fig. S3D for HLS1, repeated  
5 measures ANOVA: F-value = 28.555109,  $p = 0.0008278413$ ,  $\eta^2 = 0.877131$ ; post-hoc: Hi vs Lo  $p$   
6 = 0.0067064, Hi vs Med  $p = 0.020179$ , Hi vs spontaneous  $p = 0.017031$ ; Fig. S3E for FLS1,  
7 repeated measures ANOVA: F-value = 23.909933,  $p = 0.0000238001$ ,  $\eta^2 = 0.856682$ ; post-hoc:  
8 Hi vs Lo  $p = 0.016317$ , Hi vs Med  $p = 0.0078756$ , Hi vs spontaneous  $p = 0.025145$ ; Fig. S3F for  
9 PTA, repeated measures ANOVA: F-value = 17.738107,  $p = 0.0069307567$ ,  $\eta^2 = 0.815991$ ; post-  
10 hoc: Hi vs Lo  $p = 0.026711$ , Hi vs Med  $p = 0.027323$ , Hi vs spontaneous  $p = 0.044441$ ). We also  
11 performed optical flow analysis for visual cortical stimulation in a separate cohort of anesthetized  
12 mice ( $n = 4$ ) and found that peak speeds of evoked activity are larger than those of spontaneous  
13 activity motifs (Fig. S4, paired sample t-test  $p = 0.032798$ ). These results thus suggest that in  
14 anesthetized mice, the propagation speeds for spontaneous activity are comparable to those in  
15 evoked activity elicited with Lo stimulus levels but are smaller than those of evoked activity  
16 elicited with Hi stimulus levels.

17 Next, we compared the propagation speeds of spontaneous activity with those of sensory evoked  
18 activity in awake mice. The velocity fields for spontaneous and evoked activity at Lo stimulus  
19 strength had vectors with comparable magnitudes while sensory evoked propagations with Hi  
20 stimulus level showed velocity vectors with larger magnitudes (Fig. 4A, see scale factors for  
21 plotting vector fields and compare with scales in Fig. 3A). The average speeds (over trials and  
22 animals) were determined as described above and shown in Fig. 4B. All the graphs show a baseline  
23 speed close to zero and then a rise in speed after the stimulus onset or spontaneous motif onset

1 which gets to its peak and then declines towards baseline. The distribution of peak speeds  
2 determined from the average speed curves (Fig. 4C) were similar for evoked responses by Lo  
3 stimulus level and spontaneous motifs with no significant difference between means of peak  
4 speeds in AC ROI (Fig. 4D, repeated measures ANOVA: F-value = 37.011210,  $p = 0.0000904960$ ,  
5  $\eta^2 = 0.902466$ ; post-hoc: Lo vs spontaneous  $p = 0.60796$ ). However, the mean of peak speed for  
6 evoked responses elicited by Hi stimulus strength is significantly larger than that of both Lo  
7 stimulus level and spontaneous motifs (Fig. 4D, Hi vs Lo  $p = 0.0028434$ , Hi vs spontaneous  $p =$   
8  $0.0045889$ ). These results thus suggest that in awake mice, the propagation speed of sensory-  
9 evoked activity increases with increasing stimulus levels (similar to anesthetized mice). Also,  
10 spontaneous activity propagates at a speed similar to the speed of sensory-evoked activity elicited  
11 by Lo stimulus level.

### 12 *3.3 Spatiotemporal propagation patterns of spontaneous activity is more complex than those of* 13 *sensory-evoked activity in both anesthetized and awake mice*

14 Interaction between neuronal populations is essential for adequate brain function. This interaction  
15 often requires brain activity to flow over different brain regions. As demonstrated by wide-field  
16 imaging with VSD or glutamate, there is a sequential activation of neuronal populations which  
17 have been termed as traveling waves – see review (Muller et al., 2018). We observed propagation  
18 patterns of traveling waves and asked whether stimulus levels would affect propagation patterns  
19 of sensory-evoked activity and whether these evoked patterns were similar or different from  
20 propagation patterns of spontaneous activity. Given that there is a known cortical network  
21 responsive to saliency (Downar et al., 2002) and stronger stimulus results in higher saliency  
22 (Schultz, 2016), we hypothesized that with increasing stimulus levels, evoked activity would  
23 converge to a common propagation pattern. Furthermore, based on the functional roles of

1 spontaneous activity such as memory formation, consolidation, and retrieval, and information  
2 processing for carrying out endogenous body functions, we hypothesized that propagation patterns  
3 of spontaneous activity would be more complex than those of sensory-evoked activity i.e.  
4 spontaneous activity would have a larger repertoire of propagation patterns. To test these  
5 hypotheses, we performed two types of analyses. First, we analyzed the distributions of directions  
6 at peak values of average speeds of cortical activity in different ROIs using optical flow analysis.  
7 The directions were determined from the average velocity vectors. Second, we calculated the  
8 trajectory space of cortical activity by building normalized histograms of trajectories. For sensory-  
9 evoked and spontaneous activity, the trajectories of responses in all trials and in all motifs were  
10 used respectively.

11 In anesthetized mice, we observed a gradual convergence to a stereotypical direction of  
12 propagation with increasing stimulus levels for sensory forelimb evoked responses (Fig. 5). The  
13 distributions of directions of velocity vectors of forelimb evoked activity elicited with Lo, Med,  
14 and Hi stimulus levels became tighter and the angles became closer to the medio-caudal direction.  
15 This result was evident for directions observed in the FLS1 ROI (Fig. 5A) but was more prominent  
16 for HLS1 and PTA ROIs (Fig. 5C and 5E respectively). In order to quantify the variability of  
17 directions we determined the magnitude of the average of normalized velocity vectors i.e. first we  
18 normalized all velocity vectors such that their magnitude was 1, then we averaged all these vectors  
19 and calculated the magnitude of the vector sum. A magnitude of the average vector closer to 0  
20 would represent a large variability while a magnitude closer to 1 would represent presence of more  
21 dominant direction. The magnitude of the average vector for Lo, Med, and Hi stimulus levels  
22 increased in the FLS1 ROI (Fig. 5B) suggesting that with increasing stimulus levels, propagation  
23 directions converge to a dominant direction. This was also observed for the HLS1 and PTA ROIs

1 (Fig. 5D and 5F). This matched our visual observation of forelimb evoked VSD activity where for  
2 Med and Hi stimulus levels the response activity travels abruptly in the medio-caudal direction.  
3 For forelimb motifs in spontaneous activity, although we hypothesized that the activity  
4 propagation would be more complex in terms of distributions of directions (i.e. it would have a  
5 uniform distribution with all angles represented equally), we observed that the distributions were  
6 skewed with the majority of angles representing the caudolateral or lateral direction in the FLS1,  
7 HLS1, and PTA ROIs (Fig. 5A, 5C, and 5E). This suggests that spontaneous activity events might  
8 have a dominant direction. Furthermore, the magnitude of the average vector for spontaneous  
9 events activity shows no significant difference with the magnitude of the average vector for evoked  
10 activity elicited with Lo stimulus level in all three ROIs (Fig. 5B, 5D, and 5F). On the other hand,  
11 this measurement for spontaneous motifs is significantly smaller than that of Med and Hi stimulus  
12 strength (Fig 5D for HLS1, repeated measures ANOVA: F-value = 14.081650,  $p = 0.0003093654$ ,  
13  $\eta^2 = 0.778781$ ; post-hoc: Med vs spontaneous  $p = 0.0066370$ , Hi vs spontaneous  $p = 0.0091750$ ;  
14 5F for PTA, repeated measures ANOVA: F-value = 6.166851,  $p = 0.0088490512$ ,  $\eta^2 = 0.606565$ ;  
15 post-hoc: Hi vs spontaneous  $p = 0.0011688$ ). This observation also asserts the high similarity  
16 between spontaneous activity and evoked activity at Lo stimulus level. To investigate the structure  
17 of trajectories of evoked and spontaneous activity motifs on the cortical mantle, we analyzed  
18 normalized histograms of activity trajectories represented as heat maps (Fig. 5G). Bright and dim  
19 colors indicate larger and smaller percentage of activity respectively. For forelimb evoked activity,  
20 the trajectory space became smaller with increasing stimulus levels (Fig. 5G for representative  
21 animal). In contrast, the trajectories for forelimb motifs in spontaneous activity occupied a larger  
22 space. For a quantitative comparison of trajectories, we determined the Hausdorff fractal  
23 dimension which measures the roughness of the trajectory path. The Hausdorff fractal dimensions

1 of heat maps for spontaneous activity events were significantly larger than those of evoked activity  
2 (Fig. 5H, repeated measures ANOVA: F-value = 11.937434,  $p = 0.0111830599$ ,  $\eta^2 = 0.749019$ ;  
3 post-hoc: Med vs spontaneous  $p = 0.015937$ ). To compare the trajectory space of spontaneous  
4 activity events with all levels of evoked responses, the distributions of Hausdorff fractal dimension  
5 for both spontaneous motifs and evoked responses pooled from all stimulus intensity levels were  
6 generated using a bootstrapping technique (see methods). Fig. 5I shows these distributions for  
7 individual animals as well as the mean distributions. The Hausdorff fractal dimension distribution  
8 of spontaneous motifs spans to higher values and has higher mean value compared to the one from  
9 evoked responses (Wilcoxon rank sum test on the mean values for animals,  $p = 0.047619$ ,  $n = 5$ ).  
10 A larger Hausdorff fractal dimension corresponds to a larger space occupancy for trajectories  
11 (Singh et al., 2016) and thus spontaneous activity has a larger spatial presence as compared to  
12 sensory-evoked activity. For hindlimb stimulation, the distributions of directions observed in the  
13 HLS1 ROI for Lo, Med, and Hi, stimulus levels were similar with comparable average vector  
14 magnitudes (Fig. S5A and S5B). In the FLS1 and PTA ROIs however, the distributions of  
15 directions converged with increasing stimulus levels suggesting a stereotypical expansion of  
16 hindlimb evoked activity with Hi stimulus strength (Fig. S5C and S5E). The hindlimb motifs in  
17 spontaneous activity, similar to forelimb, had the majority of propagation angles in the caudolateral  
18 and lateral directions in the HLS1, FLS1, and PTA ROIs. The average vector magnitudes tend to  
19 be smaller than evoked responses at all levels (Fig. S5). The Hausdorff fractal dimensions of  
20 trajectory heat maps for hindlimb motifs in spontaneous activity were significantly larger than  
21 those of hindlimb-evoked activity (Fig. S5G and S5H, repeated measures ANOVA: F-value =  
22 8.356785,  $p = 0.0028671496$ ,  $\eta^2 = 0.676291$ ; post-hoc: spontaneous vs Med  $p = 0.00083979$ , :  
23 spontaneous vs Hi  $p = 0.014265$ ). For the visual sensory modality, we observed a stereotypical



1 distribution of directions for evoked activity towards the anterior brain regions while spontaneous  
2 activity events traveled in all directions (Fig. S6A and S6B). Similar to what was observed for the  
3 forelimb and hindlimb somatosensory modalities, the Hausdorff fractal dimension was larger for  
4 the spontaneous activity heat maps (Fig. S6C and S6D, paired sample t-test  $p = 0.0087369698$  ).  
5 These results combined suggest that spontaneous activity has more complex spatiotemporal  
6 propagation patterns with a wider range of angles and larger trajectory spaces than evoked activity  
7 elicited with Hi stimulus levels. Although, the distributions of directions of velocity vectors  
8 suggest that spontaneous activity motifs might have a dominant direction, its average vector  
9 magnitude is similar to Lo stimulus level and is significantly smaller than for higher stimulus  
10 strengths. Alternatively, evoked activity converges to a common propagation pattern with  
11 increasing stimulus levels. Finally, spontaneous motifs occupy a larger trajectory space compared  
12 to evoked responses.

13 Next, we investigated the propagation patterns of spontaneous and evoked activity in awake mice.  
14 For this analysis, we selected two regions over the mouse cortical surface based on visual  
15 observation of trajectories of auditory stimulation responses. These regions are adjacent to auditory  
16 cortical areas, namely anteromedial to AC ROI (AC-AM) near barrel cortex and posteromedial to  
17 AC ROI (AC-PM) near visual cortex. In the selected ROIs, results were similar to the ones  
18 observed for anesthetized mice. Sensory-evoked activity converged to a propagation pattern with  
19 increasing stimulus levels as suggested by tendency to increase in magnitude of the average of  
20 normalized velocity vectors for Lo and Hi stimulus levels (Fig. 6B, 6D, and 6F). However, the  
21 magnitudes are less than 0.5 (i.e. closer to 0), suggesting a large variability in the distributions of  
22 directions, which is evident in Fig. 6A. This matches our visual observation of auditory-evoked  
23 activity originating and expanding in the AC ROI thus giving rise to velocity vectors in all

1 directions. In the AC-AM ROI (Fig. 6C and 6D) however, the activity propagation patterns were  
2 not as clear either because the evoked activity does not travel strongly to this ROI or because when  
3 the animals are awake, the evoked activity co-exists with spontaneous activity and becomes less  
4 salient compared to the anesthetized case. For AC-PM ROI, it is interesting to note that evoked  
5 activity with Hi stimulus level has a tight distribution of directions (Fig. 6E). This suggests that  
6 with Hi stimulus strength, evoked activity traveled from the AC to AC-PM ROI in a stereotypical  
7 fashion across animals. For spontaneous activity motifs in auditory region, we observed dominant  
8 directions towards the midline of the cortical surface (Fig. 6A, 6C, and 6E). The magnitude of  
9 average velocity vector is less than 0.5, which also suggests a large variability in the direction of  
10 spontaneous activity events (Fig. 6B, 6D, and 6F). In AC-PM ROI there is no significant difference  
11 between the velocity vectors average for Lo and Hi stimulus levels and spontaneous motifs, but Hi  
12 stimulus level tends to show more stereotyped propagation direction. As described above, here  
13 also, we calculated heat maps to study the structure of cortical activity (Fig. 6G). As observed for  
14 anesthetized mice, the trajectory space occupied by spontaneous activity events was larger than  
15 that occupied by Hi stimulus evoked activity, which is confirmed by a significantly larger  
16 Hausdorff fractal dimension for spontaneous activity (Fig. 6H, repeated measures ANOVA: F-  
17 value = 11.565240,  $p = 0.0043613067$ ,  $\eta^2 = 0.743017$ ; post-hoc: spontaneous vs Hi  $p =$   
18  $0.0028885$ ). Finally, comparing distributions of Hausdorff fractal dimension for spontaneous  
19 motifs and awake evoked responses pooled from both Lo and Hi stimulus levels indicate that  
20 spontaneous motifs exhibit larger values (Wilcoxon rank sum test on the mean values for animals,  
21  $p = 0.047619$ ,  $n = 5$ ).

1 Altogether, our results suggest that the propagation patterns of spontaneous activity are more  
2 complex by occupying larger trajectory spaces compared to those of evoked activity in awake  
3 mice.

4 *3.4 Propagation speed of spontaneous activity is positively correlated with its amplitude while*  
5 *its pattern of propagation and direction stabilize as amplitude increases*

6 As reported earlier, we found that the amplitude of evoked activity is positively correlated with its  
7 speed and also with the stability of its propagation. Here, we asked if the propagation speed,  
8 direction, and pattern of spontaneous activity was also correlated with its amplitude. We found  
9 that for evoked and spontaneous activity in the forelimb and auditory regions, the propagation  
10 speed was positively correlated with its amplitude (scatter plots in Fig. 7A and D where each blue  
11 dot represents a single spontaneous activity motif and each red dot represent a single evoked trial).  
12 The fitted linear regression model showed a positive slope (Fig. 7A, spontaneous: linear  
13 coefficient=1.509 and p-value=0.000057533; evoked: linear coefficient=5.869 and p-  
14 value= $3.5064 \times 10^{-11}$ , and Fig. 7D, spontaneous: linear coefficient=3.437 and p-  
15 value= $1.2669 \times 10^{-38}$ ; evoked: linear coefficient=3.431 and p-value= $9.8767 \times 10^{-10}$ ). A similar  
16 relationship was also found between propagation direction stability and amplitude (Fig. 7B,  
17 spontaneous: linear coefficient=0.296 and p-value=0.047929; evoked: linear coefficient=0.626  
18 and p-value=0.000019484, and Fig. 7E, spontaneous: linear coefficient=3.437 and p-  
19 value= $1.2669 \times 10^{-38}$ ; evoked: linear coefficient=3.431 and p-value= $9.8767 \times 10^{-10}$ ). The stability  
20 of propagation pattern measured as the Hausdorff fractal dimension however was more stable with  
21 increasing amplitude for spontaneous activity in the forelimb region compared to auditory region  
22 (Fig. 7C, spontaneous: linear coefficient=0.601 and p-value=0.0046286; evoked: linear

1 coefficient=-0.101 and p-value=0.31972, and Fig. 7F, spontaneous: linear coefficient=0.002 and  
2 p-value=0.83653; evoked: linear coefficient=0.062 and p-value=0.13361).  
3 Similarly spontaneous activity in the forelimb region show significant positive correlation with  
4 amplitude and speed (Fig. S7A, spontaneous: linear coefficient=0.539 and p-value=0.021671;  
5 evoked: linear coefficient=5.725 and p-value= 0.000027819) stability of propagation direction in  
6 the PTA ROI (Fig. S7B, spontaneous: linear coefficient=0.336 and p-value=0.0066435; evoked:  
7 linear coefficient=0.412 and p-value=0.025690) and fractal dimension of patterns in the entire  
8 imaging field (Fig. S7C, spontaneous: linear coefficient=0.622 and p-value=0.0000023820;  
9 evoked: linear coefficient=0.057 and p-value=0.77803). For spontaneous motifs in the visual  
10 region and the whole imaging cortical area all three measurements were positively correlated with  
11 the amplitude (Fig. S7D, spontaneous: linear coefficient=6.038 and p-value= $2.6386 \times 10^{-38}$ ;  
12 evoked: linear coefficient=0.057 and p-value= $1.4251 \times 10^{-60}$ . Fig. S7E, spontaneous: linear  
13 coefficient=0.389 and p-value=  $2.4717 \times 10^{-8}$ ; evoked: linear coefficient=0.210 and p-value=  
14 0.0018673. Fig. S7F, spontaneous: linear coefficient=0.202 and p-value=0.0014744; evoked:  
15 linear coefficient=0.110 and p-value=0.017036).

16

#### 17 **4 Discussion**

18 In this paper, we used voltage-sensitive dye and glutamate imaging in anesthetized and awake  
19 mice respectively to characterize cortical dynamics of spontaneous and evoked activity at the  
20 mesoscale level. Our main conclusions were similar in anesthetized and awake mice preparations,  
21 i.e., sensory-evoked activity and spontaneous activity are similar to each other for low stimulus  
22 strength but as the stimulus strength increases, they become different from each other. Previous  
23 studies have compared spontaneous and evoked activity using different parameters such as the

1 temporal structure of single-unit activity, unit activity correlations, or dimensionality. In contrast,  
2 in this study we use more direct parameters of cortical dynamics such as amplitude, direction and  
3 speed of propagation, and complexity of the propagation trajectories. This more direct  
4 characterization of the cortical dynamics might be less influenced by confounding effects  
5 introduced in the methods to calculate such more abstract measurements.

#### 6 *4.1 The effect of stimulus strength on sensory-evoked activity*

7 When the stimulus strength was increased, the amplitude, spread, and speed of the evoked cortical  
8 response increased. These results are consistent with previous studies conducted to understand the  
9 relationship between cortical responsiveness, and the strength of sensory stimulation (Jancke et  
10 al., 1998; Spenger et al., 2000; Peeters et al., 2001; Petersen et al., 2003a; Muniak et al., 2007).  
11 The positive correlation between stimulus strength and amplitude, spread and speed of evoked  
12 cortical activity could be explained in two ways. First, since a larger number of subcortical neurons  
13 are activated with stronger stimulus, these networks, in turn, activate a larger region of cortex  
14 through one-to-one connections (Jones, 1998; Sato et al., 2012). Alternatively, the larger spatial  
15 spread of evoked cortical response in the cortex might be attributed to enhanced activation of  
16 cortico-cortical networks driven by stronger localized subcortical inputs. Further experiments are  
17 required to investigate the subcortical-cortical circuit loops involved in shaping the extent of  
18 cortical activation (Jones, 1998). In addition to the relationship between the extent of activity  
19 propagation and stimulus intensity, our results also suggest a positive correlation between the  
20 speed of the activity propagation and the stimulus strength. However, we found a negative  
21 correlation between the stimulus strength and the variability in the direction of activity  
22 propagation. Similar observations have been reported in psychophysics and electrophysiological  
23 research, where the relationship between stimulus strength or contrast and speed, accuracy or

1 variability of response are negatively correlated (Palmer et al., 2005; Deco and Hugues, 2012;  
2 Sadagopan and Ferster, 2012). An alternative explanation for observing a larger variability of  
3 directions for weaker stimuli compared to when giving stronger stimulation might be attributed to  
4 a less accurate detection of propagation direction by the optical flow method used in this study.

#### 5 *4.2 Comparison between sensory-evoked and spontaneous activity patterns*

6 Our results indicate that the amplitude of sensory-evoked cortical response is larger than the  
7 amplitude of spontaneous activity events for larger stimulus intensity (Med and Hi) in the  
8 somatosensory and visual cortices of anesthetized mice and auditory cortex of awake mice. A  
9 related comparison has been previously reported for the visual cortex of anesthetized cats and  
10 monkeys using electrophysiological recordings (Nauhaus et al., 2009). In their work, low  
11 contrast stimulus yielded high amplitude LFP waves that travelled longer distances than high-  
12 contrast evoked waves. In addition, it has been reported that in V1 of anesthetized cats, the  
13 amplitude of VSD signals of evoked and spontaneous activity are comparable (Grinvald et al.,  
14 2003). The discrepancy between these studies and our results might be due to the level of stimulus  
15 strength used, or scale (e.g., field of view) at which cortical activity was measured (micro for  
16 electrophysiology vs meso for wide-field VSD), or the origin of the signal (mostly subthreshold  
17 membrane depolarization for VSD vs a combination of subthreshold and suprathreshold activity  
18 for LFP signal) (Grinvald and Hildesheim, 2004).

19 We also found that on average, sensory-evoked activity travels faster than the spontaneous activity.  
20 On average, evoked activity in the FLS1 area travels at  $3.35 \pm 0.63$  mm/s while forelimb motifs in  
21 spontaneous activity travels at  $0.91 \pm 0.08$  mm/s. For hindlimb stimulation and HLS1 area, evoked  
22 activity travels at  $2.37 \pm 0.43$  mm/s and hindlimb spontaneous motifs travel at  $0.88 \pm 0.08$  mm/s.  
23 Sensory evoked activity in the visual cortex and its spontaneous motifs travels at  $4.79 \pm 1.88$  mm/s

1 and  $1.92 \pm 0.55$  mm/s respectively. It is important to mention that in previous VSD recordings in  
2 the visual cortex of anesthetized rats, it is reported that spontaneous activity travels faster than  
3 evoked activity (16 mm/s and 10 mm/s respectively) (Han et al., 2008). In contrast, we found that  
4 with our method, this is not the case for the somatosensory cortex, nor for visual cortex. Moreover,  
5 (Nauhaus et al., 2009; Sato et al., 2012) reported that in anesthetized monkeys and cats,  
6 spontaneous activity travels at  $\sim 0.3$  m/s in visual cortex using electrophysiological studies. One  
7 reason for the discrepancy between the speeds reported in these studies and our results might be  
8 the differences in methodology used to quantify the propagation of activity in VSD recordings and  
9 the scale of the neuronal population and brain size from which the activity was measured.  
10 In terms of propagation, sensory-evoked cortical activity has more stereotyped directions of  
11 propagation and trajectories (with higher stimulus strengths) compared to spontaneous activity  
12 which shows a broader distribution of possible directions of activity propagation. We also show  
13 that the trajectories of spontaneous activity sample a broader space than during evoked activity.

#### 14 *4.3 Possible mechanisms for the differences between sensory-evoked and spontaneous activity*

15 Why would evoked activity have larger amplitudes than spontaneous activity? And why would  
16 spontaneous activity travel slower and longer distances than evoked activity? The explanation for  
17 this might lie in the difference in their origin and the particular circuitry of the laminar structure  
18 of the cortex. While spontaneous activity spreads upward from deep layers and slowly across  
19 columns, evoked activity, on the other hand, initiates in thalamocortical recipient layers and  
20 spreads rapidly across columns (Sakata and Harris, 2009; Chauvette et al., 2010; Beltramo et al.,  
21 2013; Petersen and Crochet, 2013).

22 Since in VSD, most of the signal comes from superficial cortical layers that contain dendritic trees  
23 of neurons located in both layer 2/3 (L2/3) and layer 5 (L5) (Chemla and Chavane, 2010;

1 Mohajerani et al., 2011), the explanation for the differences reported in this work might be found  
2 by revisiting the input circuitry of L2/3 of the cortex (Sakata and Harris, 2009). According to the  
3 canonical circuit, sensory evoked activity flows into and through the cortex first from the thalamus  
4 to layer 4 (L4), then to L2/3 and finally to L5/6 (Douglas and Martin, 2004; DeNardo et al., 2015).  
5 Although it has been shown that the connectivity of the somatosensory cortex largely follows this  
6 canonical circuit, there is recent evidence that L2/3, L5, and L6 also receive inputs directly from  
7 the thalamus (Viaene et al., 2011; Constantinople and Bruno, 2013; DeNardo et al., 2015). Thus,  
8 the larger amplitude and faster propagation observed during evoked activity could be due to strong  
9 thalamic inputs apart from the already existent cortico-cortical connections used during  
10 spontaneous activity (Bruno and Sakmann, 2006). Finally, a factor for the shorter propagation of  
11 evoked activity compared to spontaneous activity might be due to the inhibition triggered by the  
12 thalamocortical system engaged after the initiation of evoked activity (Sheroziya and Timofeev,  
13 2014; McCormick et al., 2015).

14 The observation that spontaneous activity has a larger number of patterns compared to evoked  
15 activity in a sensory region might be explained by how networks are wired during early and later  
16 development. It is known that during early development, neuronal connections are first formed by  
17 genetically driven molecular factors and later shaped by patterned spontaneous activity so much  
18 so that networks can interpret sensory signals or show tuning without prior experience e.g.,  
19 presence of orientation selectivity in the visual system before visual experience (Chapman et al.,  
20 1999; Ackman and Crair, 2014; McVea et al., 2016), path integration during early stages before  
21 maturation of grid cells (Bjerknes et al., 2018). In a sensory brain region therefore, during early  
22 development one would expect to see a larger repertoire of spontaneous activity patterns compared  
23 to evoked activity which perhaps is carried forward to adulthood (McVea et al.,



1 2017). Furthermore, in an adult sensory brain region e.g., visual cortex, one might expect to see  
2 neuronal activity correlated with many non-visual behaviors such as those associated with facial  
3 motion (Stringer et al., 2019). Therefore, during development, primary sensory areas also get wired  
4 with many other brain regions. In studies such as ours where behavior is not recorded and  
5 quantified, activity associated with non-sensory behaviors would be deemed spontaneous activity  
6 (at least in awake preparation) and therefore would have more diverse patterns than sensory-  
7 evoked activity.

#### 8 *4.4 Functional relevance of differences between sensory-evoked and spontaneous activity*

9 While evoked activity is arguably only involved in sensory processing, spontaneous activity has  
10 multiple functions including memory consolidation, refinement of cortical circuitry, and synaptic  
11 homeostasis. Therefore, the possible realm of computations involved during the communication  
12 amongst different cortical circuits during spontaneous activity might be broader than the ones  
13 involved only in processing sensory information (Luczak et al., 2007). Moreover, the differences  
14 in speed and propagation can be strongly related to the functional roles of spontaneous and evoked  
15 activity in learning and memory (Mercado, 2014). These observations are based on evidence about  
16 the sparse action potential firing of L2/3 and which, in combination with its dense subthreshold  
17 inputs can be exploited for associative learning (Petersen and Crochet, 2013). This sparse action  
18 potential firing of L2/3 might be paired with specific sensory events, top-down input, and  
19 neuromodulatory input to regulate plasticity. Therefore, the temporal differences between  
20 spontaneous and evoked activity, in the order of milliseconds, might be directly related to synaptic  
21 processes. For example, the faster propagation of evoked activity might involve different synaptic  
22 processes to facilitate the encoding of relevant events. On the other hand, the longer propagation  
23 of spontaneous activity might involve the ‘replay’ of coherent experiences or memories distributed

1 over large cortical areas for consolidation (Wilson and McNaughton, 1994; Hoffman et al., 2007;  
2 Ji and Wilson, 2007). In contrast, the similarities found between spontaneous activity and sensory-  
3 evoked activity with low stimulus strength at both micro and meso scales, might be due to the  
4 restrictions imposed by the brain circuitry (Luczak and Maclean, 2012) i.e., the underlying  
5 common brain hardware.

6 This study clarifies the discrepancies in similarities and differences previously reported for  
7 spontaneous and evoked activity. Using wide-field imaging allowed for better resolution in space  
8 than previous electrophysiological studies (Luczak et al., 2009; Sakata and Harris, 2009) and in  
9 time than previous fMRI studies (Jancke et al., 1998; Spenger et al., 2000; Huang et al., 2015) , or  
10 imaging studies over a small cortical area (Han et al., 2008). Spontaneous activity characteristics  
11 including amplitude, propagation speed, and direction distribution is similar to evoked activity  
12 elicited with lower stimulus strength. Also, the trajectory space of spontaneous activity covers a  
13 larger cortical area compared to evoked activity.

#### 14 *4.5 Differences in spontaneous and evoked activity as a biomarker for neuropsychiatric* 15 *disorders*

16 Alterations in the balance of excitation and inhibition ratio in the cerebral cortex have been  
17 suggested as an explanation for various neurological and psychiatric disorders such as  
18 schizophrenia (Goel and Portera-Cailliau, 2019). Similarly, the differences in sensory-evoked and  
19 spontaneous activity might be good candidates as objective biomarkers for clinical diagnosis of  
20 neurological and psychiatric disorders. Resting-state spontaneous activity alone measured with  
21 fMRI (Fox and Raichle, 2007; Kiviniemi, 2008) has been used to differentiate between normal  
22 individuals and patients with various neurological diseases (Fox and Greicius, 2010) such as  
23 Alzheimer disease (Zeng et al., 2019), Parkinson's disease (Zhang et al., 2019), schizophrenia

1 (Nejad et al., 2012), tinnitus (Cai et al., 2019), unilateral amblyopia (Dai et al., 2019), amyotrophic  
2 lateral sclerosis (Luo et al., 2012), idiopathic trigeminal neuralgia (Yuan et al., 2018), and corneal  
3 ulcer (Shi et al., 2019). In addition, combined task-evoked and spontaneous activity fMRI have  
4 been used for pre-operative mapping (Fox et al., 2016). In the above-mentioned studies, three main  
5 types of analysis have been used; 1) regional coherence in which similarity of activity of  
6 neighboring voxels is assessed using cross-correlation, 2) power spectrum analysis in which  
7 amplitudes of low-frequency fluctuations are measured, and 3) spatial pattern analysis in which  
8 the topology of activity is compared between controls and diseased individuals (Fox and Greicius,  
9 2010). These analyses lack focus on the dynamics of activity i.e., speed and propagation. A greater  
10 understanding of the parallel time-varying properties of resting-state activity is increasingly  
11 believed to be essential to understanding brain function in health and disease). We propose the use  
12 of task-independent graded stimuli for recording local evoked activity and its comparison with  
13 corresponding local resting-state spontaneous activity for identifying diseased individuals. This  
14 may have particular utility in revealing the neural circuit dysfunction underlying altered sensory  
15 processing in neuropsychiatric disease contexts. For example, individuals with schizophrenia  
16 exhibit deficits in auditory sensory gating as revealed by the suppression of event related potential  
17 markers P50 and N100 (Brockhaus-Dumke et al., 2008; Javitt, 2009). The methods described in  
18 our study allow the characterization of the dynamics of activity, and therefore, would provide  
19 superior discrimination measurements. Moreover, this approach could be extended to human  
20 studies using fMRI by adapting our methods to 3D version of the optical flow analysis for  
21 estimation of activity speed and propagation (von Tiedemann et al., 2010; Rajna et al., 2019).

22

1 *Disclosures*

2 The authors have no relevant financial interests in the manuscript and no other potential conflicts  
3 of interest to disclose.

4 **Acknowledgments:** *This work was supported by a Natural Sciences and Engineering Research*  
5 *Council of Canada (NSERC) Discovery Grant #40352, Campus Alberta for Innovation Program*  
6 *Chair, Alberta Alzheimer Research Program to MHM and NSERC CREATE in BIP doctoral*  
7 *fellowship to NA. We thank Jianjun Sun for assistance with surgeries, Behroo Mirza Agha and Di*  
8 *Shao for animal husbandry, and Allen Chan and Timothy H. Murphy for critical reading of the*  
9 *manuscript.*

10 **Author Contribution:** Conceptualization, M.H.M., N.A., S.I., and E.B.C., A.L., B.L.M.;  
11 Methodology, M.H.M., N.A., S.I., and E.B.C.; Formal Analysis, N.A. and S.I.; Writing - Original  
12 Draft, M.H.M., N.A., S.I., and E.B.C.; Writing - Review & Editing, M.H.M., N.A., S.I., A.L.,  
13 E.B.C., and B.L.M.; Funding Acquisition, M.H.M., B.L.M., A.L.; Resources, M.H.M.;  
14 Supervision, M.H.M.

15 **Competing financial interests:** The authors declare no competing financial interests.

16 **References:**

17 Ackman JB, Crair MC (2014) Role of emergent neural activity in visual map development. *Curr*  
18 *Opin Neurobiol* 24:166-175.  
19 Afrashteh N, Inayat S, Mohsenvand M, Mohajerani MH (2017) Optical-flow analysis toolbox for  
20 characterization of spatiotemporal dynamics in mesoscale optical imaging of brain activity.  
21 *NeuroImage* 153:58-74.  
22 Alloway KD, Johnson MJ, Wallace MB (1993) Thalamocortical interactions in the somatosensory  
23 system: interpretations of latency and cross-correlation analyses. *Journal of*  
24 *neurophysiology* 70:892-908.  
25 Arieli A, Shoham D, Hildesheim R, Grinvald A (1995) Coherent spatiotemporal patterns of  
26 ongoing activity revealed by real-time optical imaging coupled with single-unit recording  
27 in the cat visual cortex. *Journal of neurophysiology* 73:2072-2093.

- 1 Azzarelli R, Oleari R, Lettieri A, Andre V, Cariboni A (2017) In Vitro, Ex Vivo and In Vivo  
2 Techniques to Study Neuronal Migration in the Developing Cerebral Cortex. *Brain Sci* 7.  
3 Beltramo R, D'Urso G, Dal Maschio M, Farisello P, Bovetti S, Clovis Y, Lassi G, Tucci V, De  
4 Pietri Tonelli D, Fellin T (2013) Layer-specific excitatory circuits differentially control  
5 recurrent network dynamics in the neocortex. *Nat Neurosci* 16:227-234.  
6 Berkes P, Orban G, Lengyel M, Fiser J (2011) Spontaneous cortical activity reveals hallmarks of  
7 an optimal internal model of the environment. *Science* 331:83-87.  
8 Bjerknes TL, Dagslott NC, Moser EI, Moser MB (2018) Path integration in place cells of  
9 developing rats. *Proc Natl Acad Sci U S A* 115:E1637-E1646.  
10 Bokil H, Andrews P, Kulkarni JE, Mehta S, Mitra PP (2010) Chronux: a platform for analyzing  
11 neural signals. *J Neurosci Methods* 192:146-151.  
12 Brockhaus-Dumke A, Schultze-Lutter F, Mueller R, Tendolkar I, Bechdorf A, Pukrop R,  
13 Klosterkoetter J, Ruhrmann S (2008) Sensory gating in schizophrenia: P50 and N100  
14 gating in antipsychotic-free subjects at risk, first-episode, and chronic patients. *Biol*  
15 *Psychiatry* 64:376-384.  
16 Bruno RM, Sakmann B (2006) Cortex is driven by weak but synchronously active thalamocortical  
17 synapses. *Science* 312:1622-1627.  
18 Butts DA, Goldman MS (2006) Tuning curves, neuronal variability, and sensory coding. *PLoS*  
19 *biology* 4:e92.  
20 Cai WW, Li Z, Yang Q, Zhang T (2019) Abnormal Spontaneous Neural Activity of the Central  
21 Auditory System Changes the Functional Connectivity in the Tinnitus Brain: A Resting-  
22 State Functional MRI Study. *Front Neurosci* 13.  
23 Carriot J, Jamali M, Chacron MJ, Cullen KE (2017) The statistics of the vestibular input  
24 experienced during natural self-motion differ between rodents and primates. *J Physiol*  
25 595:2751-2766.  
26 Chapman B, Godecke I, Bonhoeffer T (1999) Development of orientation preference in the  
27 mammalian visual cortex. *J Neurobiol* 41:18-24.  
28 Chauvette S, Volgushev M, Timofeev I (2010) Origin of active states in local neocortical networks  
29 during slow sleep oscillation. *Cereb Cortex* 20:2660-2674.  
30 Chemla S, Chavane F (2010) A biophysical cortical column model to study the multi-component  
31 origin of the VSDI signal. *NeuroImage* 53:420-438.  
32 Constantinople CM, Bruno RM (2013) Deep cortical layers are activated directly by thalamus.  
33 *Science* 340:1591-1594.  
34 Corbetta M, Patel G, Shulman GL (2008) The reorienting system of the human brain: from  
35 environment to theory of mind. *Neuron* 58:306-324.  
36 Dai P, Zhang J, Wu J, Chen Z, Zou B, Wu Y, Wei X, Xiao M (2019) Altered Spontaneous Brain  
37 Activity of Children with Unilateral Amblyopia: A Resting State fMRI Study. *Neural Plast*  
38 2019:3681430.  
39 Deco G, Hugues E (2012) Neural network mechanisms underlying stimulus driven variability  
40 reduction. *PLoS Comput Biol* 8:e1002395.  
41 Deco G, Jirsa VK, McIntosh AR (2013) Resting brains never rest: computational insights into  
42 potential cognitive architectures. *Trends Neurosci* 36:268-274.  
43 DeNardo LA, Berns DS, DeLoach K, Luo L (2015) Connectivity of mouse somatosensory and  
44 prefrontal cortex examined with trans-synaptic tracing. *Nat Neurosci* 18:1687-1697.  
45 Douglas RJ, Martin KA (2004) Neuronal circuits of the neocortex. *Annu Rev Neurosci* 27:419-  
46 451.

- 1 Downar J, Crawley AP, Mikulis DJ, Davis KD (2002) A cortical network sensitive to stimulus  
2 salience in a neutral behavioral context across multiple sensory modalities. *Journal of*  
3 *neurophysiology* 87:615-620.
- 4 Faisal AA, Selen LP, Wolpert DM (2008) Noise in the nervous system. *Nat Rev Neurosci* 9:292-  
5 303.
- 6 Ferezou I, Haiss F, Gentet LJ, Aronoff R, Weber B, Petersen CC (2007) Spatiotemporal dynamics  
7 of cortical sensorimotor integration in behaving mice. *Neuron* 56:907-923.
- 8 Fox MD, Raichle ME (2007) Spontaneous fluctuations in brain activity observed with functional  
9 magnetic resonance imaging. *Nat Rev Neurosci* 8:700-711.
- 10 Fox MD, Greicius M (2010) Clinical Applications of Resting State Functional Connectivity. *Front*  
11 *Syst Neurosci* 4.
- 12 Fox MD, Qian T, Madsen JR, Wang D, Li M, Ge M, Zuo HC, Groppe DM, Mehta AD, Hong B,  
13 Liu H (2016) Combining task-evoked and spontaneous activity to improve pre-operative  
14 brain mapping with fMRI. *NeuroImage* 124:714-723.
- 15 Goel A, Portera-Cailliau C (2019) Autism in the Balance: Elevated E-I Ratio as a Homeostatic  
16 Stabilization of Synaptic Drive. *Neuron* 101:543-545.
- 17 Grinvald A, Hildesheim R (2004) VSDI: a new era in functional imaging of cortical dynamics.  
18 *Nature reviews Neuroscience* 5:874-885.
- 19 Grinvald A, Arieli A, Tsodyks M, Kenet T (2003) Neuronal assemblies: single cortical neurons  
20 are obedient members of a huge orchestra. *Biopolymers* 68:422-436.
- 21 Guo W, Chambers AR, Darrow KN, Hancock KE, Shinn-Cunningham BG, Polley DB (2012)  
22 Robustness of cortical topography across fields, laminae, anesthetic states, and  
23 neurophysiological signal types. *The Journal of neuroscience : the official journal of the*  
24 *Society for Neuroscience* 32:9159-9172.
- 25 Han F, Caporale N, Dan Y (2008) Reverberation of recent visual experience in spontaneous  
26 cortical waves. *Neuron* 60:321-327.
- 27 He BJ (2011) Scale-free properties of the functional magnetic resonance imaging signal during  
28 rest and task. *The Journal of neuroscience : the official journal of the Society for*  
29 *Neuroscience* 31:13786-13795.
- 30 Hoffman KL, McNaughton BL (2002) Coordinated reactivation of distributed memory traces in  
31 primate neocortex. *Science* 297:2070-2073.
- 32 Hoffman KL, Battaglia FP, Harris K, MacLean JN, Marshall L, Mehta MR (2007) The upshot of  
33 up states in the neocortex: from slow oscillations to memory formation. *The Journal of*  
34 *neuroscience : the official journal of the Society for Neuroscience* 27:11838-11841.
- 35 Huang Z, Zhang J, Longtin A, Dumont G, Duncan NW, Pokorny J, Qin P, Dai R, Ferri F, Weng  
36 X, Northoff G (2015) Is There a Nonadditive Interaction Between Spontaneous and Evoked  
37 Activity? Phase-Dependence and Its Relation to the Temporal Structure of Scale-Free  
38 Brain Activity. *Cereb Cortex*.
- 39 Ito T, Brincat SL, Siegel M, Mill RD, He BJ, Miller EK, Rotstein HG, Cole MW (2019) Task-  
40 evoked activity quenches neural correlations and variability in large-scale brain systems.  
41 *bioRxiv*.
- 42 Jacobs J (2014) Hippocampal theta oscillations are slower in humans than in rodents: implications  
43 for models of spatial navigation and memory. *Philos Trans R Soc Lond B Biol Sci*  
44 369:20130304.
- 45 Jancke L, Shah NJ, Posse S, Grosse-Ryken M, Muller-Gartner HW (1998) Intensity coding of  
46 auditory stimuli: an fMRI study. *Neuropsychologia* 36:875-883.

- 1 Javitt DC (2009) Sensory processing in schizophrenia: neither simple nor intact. *Schizophr Bull*  
2 35:1059-1064.
- 3 Ji D, Wilson MA (2007) Coordinated memory replay in the visual cortex and hippocampus during  
4 sleep. *Nat Neurosci* 10:100-107.
- 5 Jones EG (1998) Viewpoint: the core and matrix of thalamic organization. *Neuroscience* 85:331-  
6 345.
- 7 Jones LA, Smith AM (2014) Tactile sensory system: encoding from the periphery to the cortex.  
8 *Wiley interdisciplinary reviews Systems biology and medicine* 6:279-287.
- 9 Karimi Abadchi J, Nazari-Ahangarkolae M, Gattas S, Bermudez-Contreras E, Luczak A,  
10 McNaughton BL, Mohajerani MH (2020) Spatiotemporal patterns of neocortical activity  
11 around hippocampal sharp-wave ripples. *Elife* 9.
- 12 Kenet T, Bibitchkov D, Tsodyks M, Grinvald A, Arieli A (2003) Spontaneously emerging cortical  
13 representations of visual attributes. *Nature* 425:954-956.
- 14 Kiviniemi V (2008) Endogenous brain fluctuations and diagnostic imaging. *Hum Brain Mapp*  
15 29:810-817.
- 16 Kyweriga M, Mohajerani MH (2016) Optogenetic Approaches for Mesoscopic Brain Mapping.  
17 *Methods Mol Biol* 1408:251-265.
- 18 Lim DH, Ledue J, Mohajerani MH, Vanni MP, Murphy TH (2013) Optogenetic approaches for  
19 functional mouse brain mapping. *Front Neurosci* 7:54.
- 20 Lim DH, Mohajerani MH, Ledue J, Boyd J, Chen S, Murphy TH (2012) In vivo Large-Scale  
21 Cortical Mapping Using Channelrhodopsin-2 Stimulation in Transgenic Mice Reveals  
22 Asymmetric and Reciprocal Relationships between Cortical Areas. *Front Neural Circuits*  
23 6:11.
- 24 Luczak A, Maclean JN (2012) Default activity patterns at the neocortical microcircuit level. *Front*  
25 *Integr Neurosci* 6:30.
- 26 Luczak A, Bartho P, Harris KD (2009) Spontaneous events outline the realm of possible sensory  
27 responses in neocortical populations. *Neuron* 62:413-425.
- 28 Luczak A, McNaughton BL, Harris KD (2015) Packet-based communication in the cortex. *Nat*  
29 *Rev Neurosci* 16:745-755.
- 30 Luczak A, Bartho P, Marguet SL, Buzsaki G, Harris KD (2007) Sequential structure of neocortical  
31 spontaneous activity in vivo. *Proc Natl Acad Sci U S A* 104:347-352.
- 32 Luo C, Chen Q, Huang R, Chen X, Chen K, Huang X, Tang H, Gong Q, Shang HF (2012) Patterns  
33 of spontaneous brain activity in amyotrophic lateral sclerosis: a resting-state fMRI study.  
34 *PLoS One* 7:e45470.
- 35 MacLean JN, Watson BO, Aaron GB, Yuste R (2005) Internal dynamics determine the cortical  
36 response to thalamic stimulation. *Neuron* 48:811-823.
- 37 McCormick DA (1999) Spontaneous activity: signal or noise? *Science* 285:541-543.
- 38 McCormick DA, McGinley MJ, Salkoff DB (2015) Brain state dependent activity in the cortex  
39 and thalamus. *Curr Opin Neurobiol* 31:133-140.
- 40 McGinley MJ, David SV, McCormick DA (2015) Cortical Membrane Potential Signature of  
41 Optimal States for Sensory Signal Detection. *Neuron* 87:179-192.
- 42 McVea DA, Murphy TH, Mohajerani MH (2016) Large Scale Cortical Functional Networks  
43 Associated with Slow-Wave and Spindle-Burst-Related Spontaneous Activity. *Front*  
44 *Neural Circuits* 10:103.

- 1 McVea DA, Murphy TH, Mohajerani MH (2017) Spontaneous activity synchronizes whisker-  
2 related sensorimotor networks prior to their maturation in the developing rat cortex.  
3 bioRxiv.
- 4 Menon RS, Kim S (1999) Spatial and temporal limits in cognitive neuroimaging with fMRI.  
5 Trends in Cognitive Sciences 3:208-215.
- 6 Mercado EI (2014) Relating Cortical Wave Dynamics to Learning and Remembering.  
7 neuroscience 2014, Vol 1, Pages 185-209.
- 8 Mohajerani MH, Aminoltejari K, Murphy TH (2011) Targeted mini-strokes produce changes in  
9 interhemispheric sensory signal processing that are indicative of disinhibition within  
10 minutes. Proc Natl Acad Sci U S A 108:E183-191.
- 11 Mohajerani MH, McVea DA, Fingas M, Murphy TH (2010) Mirrored bilateral slow-wave cortical  
12 activity within local circuits revealed by fast bihemispheric voltage-sensitive dye imaging  
13 in anesthetized and awake mice. The Journal of neuroscience : the official journal of the  
14 Society for Neuroscience 30:3745-3751.
- 15 Mohajerani MH, Chan AW, Mohsenvand M, LeDue J, Liu R, McVea DA, Boyd JD, Wang YT,  
16 Reimers M, Murphy TH (2013) Spontaneous cortical activity alternates between motifs  
17 defined by regional axonal projections. Nat Neurosci 16:1426-1435.
- 18 Muller L, Chavane F, Reynolds J, Sejnowski TJ (2018) Cortical travelling waves: mechanisms  
19 and computational principles. Nat Rev Neurosci 19:255-268.
- 20 Muniak MA, Ray S, Hsiao SS, Dammann JF, Bensmaia SJ (2007) The neural coding of stimulus  
21 intensity: linking the population response of mechanoreceptive afferents with  
22 psychophysical behavior. The Journal of neuroscience : the official journal of the Society  
23 for Neuroscience 27:11687-11699.
- 24 Musall S, Kaufman MT, Juavinett AL, Gluf S, Churchland AK (2019) Single-trial neural dynamics  
25 are dominated by richly varied movements. Nat Neurosci 22:1677-1686.
- 26 Nauhaus I, Busse L, Carandini M, Ringach DL (2009) Stimulus contrast modulates functional  
27 connectivity in visual cortex. Nat Neurosci 12:70-76.
- 28 Nejad AB, Ebdrup BH, Glenthøj BY, Siebner HR (2012) Brain Connectivity Studies in  
29 Schizophrenia: Unravelling the Effects of Antipsychotics. In: Curr Neuropharmacol, pp  
30 219-230.
- 31 Niell CM, Stryker MP (2010) Modulation of visual responses by behavioral state in mouse visual  
32 cortex. Neuron 65:472-479.
- 33 Omer DB, Fekete T, Ulchin Y, Hildesheim R, Grinvald A (2019) Dynamic Patterns of  
34 Spontaneous Ongoing Activity in the Visual Cortex of Anesthetized and Awake Monkeys  
35 are Different. Cereb Cortex 29:1291-1304.
- 36 Otsu N (1979) Threshold Selection Method from Gray-Level Histograms. Ieee T Syst Man Cyb  
37 9:62-66.
- 38 Palmer J, Huk AC, Shadlen MN (2005) The effect of stimulus strength on the speed and accuracy  
39 of a perceptual decision. J Vis 5:376-404.
- 40 Parga N, Abbott LF (2007) Network model of spontaneous activity exhibiting synchronous  
41 transitions between up and down States. Front Neurosci 1:57-66.
- 42 Peeters RR, Tindemans I, De Shutter E, Van der Linden A (2001) Comparing BOLD fMRI signal  
43 changes in the awake and anesthetized rat during electrical forepaw stimulation. Magnetic  
44 Resonance Imaging 19:821-826.
- 45 Petersen CC, Crochet S (2013) Synaptic computation and sensory processing in neocortical layer  
46 2/3. Neuron 78:28-48.



- 1 Petersen CC, Grinvald A, Sakmann B (2003a) Spatiotemporal dynamics of sensory responses in  
2 layer 2/3 of rat barrel cortex measured in vivo by voltage-sensitive dye imaging combined  
3 with whole-cell voltage recordings and neuron reconstructions. *The Journal of*  
4 *neuroscience : the official journal of the Society for Neuroscience* 23:1298-1309.
- 5 Petersen CC, Hahn TT, Mehta M, Grinvald A, Sakmann B (2003b) Interaction of sensory  
6 responses with spontaneous depolarization in layer 2/3 barrel cortex. *Proc Natl Acad Sci*  
7 *U S A* 100:13638-13643.
- 8 Polley DB, Read HL, Storace DA, Merzenich MM (2007) Multiparametric auditory receptive field  
9 organization across five cortical fields in the albino rat. *Journal of neurophysiology*  
10 97:3621-3638.
- 11 Ponce-Alvarez A, He BJ, Hagmann P, Deco G (2015) Task-Driven Activity Reduces the Cortical  
12 Activity Space of the Brain: Experiment and Whole-Brain Modeling. *PLoS Comput Biol*  
13 11:e1004445.
- 14 Raichle ME (2010) Two views of brain function. *Trends Cogn Sci* 14:180-190.
- 15 Rajna Z, Raitamaa L, Tuovinen T, Heikkila J, Kiviniemi V, Seppanen T (2019) 3D Multi-  
16 Resolution Optical Flow Analysis of Cardiovascular Pulse Propagation in Human Brain.  
17 *IEEE Trans Med Imaging* 38:2028-2036.
- 18 Ringach DL (2009) Spontaneous and driven cortical activity: implications for computation. *Curr*  
19 *Opin Neurobiol* 19:439-444.
- 20 Sadagopan S, Ferster D (2012) Feedforward origins of response variability underlying contrast  
21 invariant orientation tuning in cat visual cortex. *Neuron* 74:911-923.
- 22 Sakata S, Harris KD (2009) Laminar structure of spontaneous and sensory-evoked population  
23 activity in auditory cortex. *Neuron* 64:404-418.
- 24 Sato TK, Nauhaus I, Carandini M (2012) Traveling waves in visual cortex. *Neuron* 75:218-229.
- 25 Schultz W (2016) Dopamine reward prediction-error signalling: a two-component response. *Nat*  
26 *Rev Neurosci* 17:183-195.
- 27 Sellers KK, Bennett DV, Hutt A, Williams JH, Frohlich F (2015) Awake vs. anesthetized: layer-  
28 specific sensory processing in visual cortex and functional connectivity between cortical  
29 areas. *Journal of neurophysiology* 113:3798-3815.
- 30 Seung HS, Sompolinsky H (1993) Simple models for reading neuronal population codes.  
31 *ProcNatlAcadSci* 90:10749-10753.
- 32 Sheroziya M, Timofeev I (2014) Global intracellular slow-wave dynamics of the thalamocortical  
33 system. *The Journal of neuroscience : the official journal of the Society for Neuroscience*  
34 34:8875-8893.
- 35 Shi WQ, Wu W, Ye L, Jiang N, Liu WF, Shu YQ, Su T, Lin Q, Min YL, Li B, Zhu PW, Shao Y  
36 (2019) Altered spontaneous brain activity patterns in patients with corneal ulcer using  
37 amplitude of low-frequency fluctuation: An fMRI study. *Exp Ther Med* 18:125-132.
- 38 Shoham D, Glaser DE, Arieli A, Kenet T, Wijnbergen C, Toledo Y, Hildesheim R, Grinvald A  
39 (1999) Imaging cortical dynamics at high spatial and temporal resolution with novel blue  
40 voltage-sensitive dyes. *Neuron* 24:791-802.
- 41 Simoncelli EP (2003) Vision and the statistics of the visual environment. *Curr Opin Neurobiol*  
42 13:144-149.
- 43 Singh S, Kaur H, Sandhir R (2016) Fractal dimensions: A new paradigm to assess spatial memory  
44 and learning using Morris water maze. *Behavioural brain research* 299:141-146.

- 1 Spenger C, Josephson A, Klason T, Hoehn M, Schwindt W, Ingvar M, Olson L (2000) Functional  
2 MRI at 4.7 tesla of the rat brain during electric stimulation of forepaw, hindpaw, or tail in  
3 single- and multislice experiments. *Exp Neurol* 166:246-253.
- 4 Stringer C, Pachitariu M, Steinmetz N, Reddy CB, Carandini M, Harris KD (2019) Spontaneous  
5 behaviors drive multidimensional, brainwide activity. *Science* 364:255.
- 6 Stringer C, Pachitariu M, Steinmetz NA, Okun M, Bartho P, Harris KD, Sahani M, Lesica NA  
7 (2016) Inhibitory control of correlated intrinsic variability in cortical networks. *Elife* 5.
- 8 Viaene AN, Petrof I, Sherman SM (2011) Synaptic properties of thalamic input to layers 2/3 and  
9 4 of primary somatosensory and auditory cortices. *Journal of neurophysiology* 105:279-  
10 292.
- 11 von Tiedemann M, Fridberger A, Ulfendahl M, de Monvel JB (2010) Brightness-compensated 3-  
12 D optical flow algorithm for monitoring cochlear motion patterns. *J Biomed Opt*  
13 15:056012.
- 14 Wilson MA, McNaughton BL (1994) Reactivation of hippocampal ensemble memories during  
15 sleep. *Science* 265:676-679.
- 16 Xie Y, Chan AW, McGirr A, Xue S, Xiao D, Zeng H, Murphy TH (2016) Resolution of High-  
17 Frequency Mesoscale Intracortical Maps Using the Genetically Encoded Glutamate Sensor  
18 iGluSnFR. *The Journal of neuroscience : the official journal of the Society for*  
19 *Neuroscience* 36:1261-1272.
- 20 Yang Y, Lee J, Kim G (2020) Integration of locomotion and auditory signals in the mouse inferior  
21 colliculus. *Elife* 9.
- 22 Yuan J, Cao S, Huang Y, Zhang Y, Xie P, Fu B, Zhang T, Song G, Yu T, Zhang M (2018) Altered  
23 Spontaneous Brain Activity in Patients With Idiopathic Trigeminal Neuralgia: A Resting-  
24 state Functional MRI Study. *Clin J Pain* 34:600-609.
- 25 Zeng Q, Luo X, Li K, Wang S, Zhang R, Hong H, Huang P, Jiaerken Y, Xu X, Xu J, Wang C,  
26 Zhou J, Zhang M (2019) Distinct Spontaneous Brain Activity Patterns in Different  
27 Biologically-Defined Alzheimer's Disease Cognitive Stage: A Preliminary Study. *Front*  
28 *Aging Neurosci* 11:350.
- 29 Zhang C, Dou B, Wang J, Xu K, Zhang H, Sami MU, Hu C, Rong Y, Xiao Q, Chen N, Li K (2019)  
30 Dynamic Alterations of Spontaneous Neural Activity in Parkinson's Disease: A Resting-  
31 State fMRI Study. *Front Neurol* 10.

32  
33  
34  
35  
36  
37  
38  
39  
40  
41  
42  
43  
44  
45  
46



1 response) respectively. \* and \*\* indicate  $p < 0.05$  and  $p < 0.01$  respectively repeated measure  
 2 ANOVA with post-hoc Tukey-Kramer correction.

3

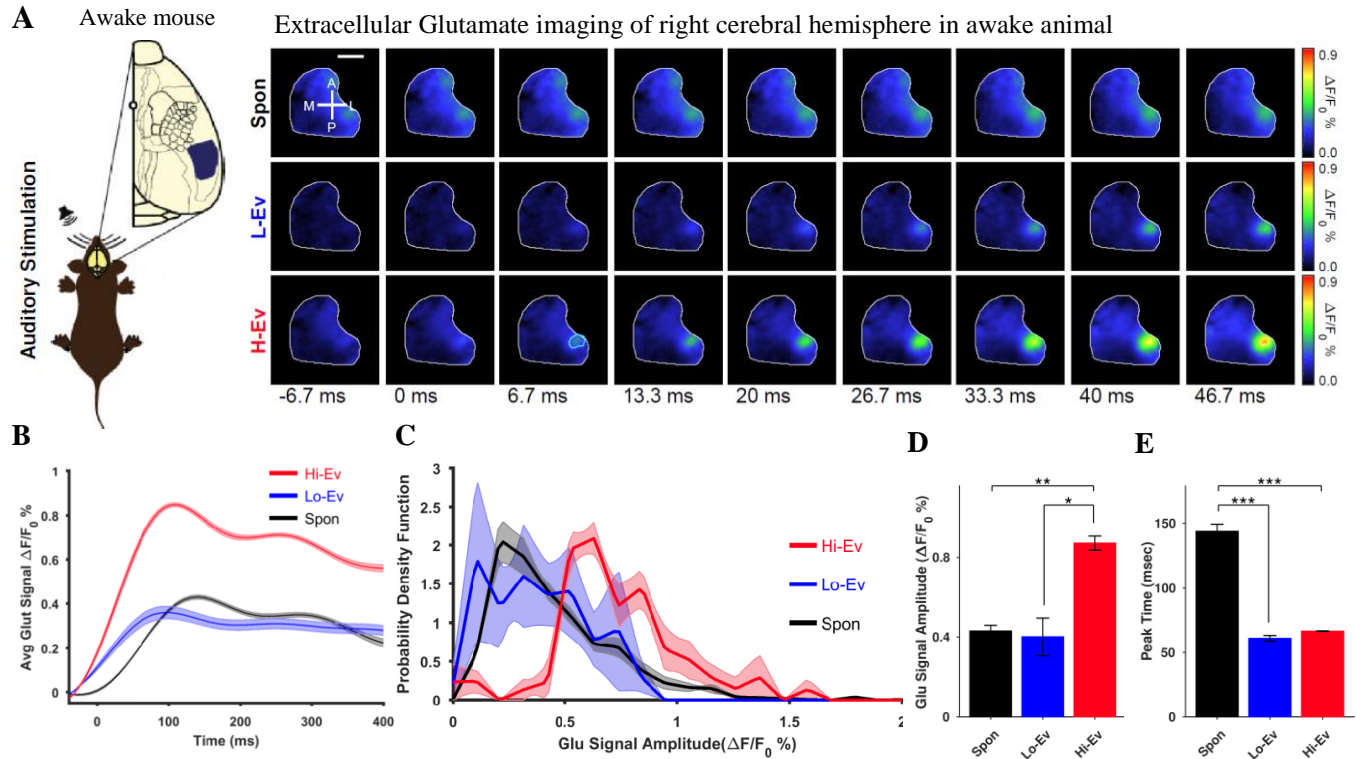

4

5 **Fig. 2 Amplitude of tone-evoked activity is larger than that of spontaneous activity in awake**

6 **mice. (A)** Experimental paradigm (left) and montages of extracellular glutamate imaging (right).

7 Montage top row shows a representative average motif of auditory spontaneous (Spon) activity

8 motifs. Bottom two rows show average evoked (Ev) cortical activity in response to auditory

9 stimulation with low (Lo) and high (Hi) stimuli strengths. The primary auditory region of interest

10 (AC-ROI) is outlined in the third column of the bottom row. Compass lines indicate anterior (A),

11 posterior (P), medial (M) and lateral (L) directions. Scale bar is 1 mm. **(B)** Plots of the average

12 glutamate signal in the AC-ROI (n=5 animals). The plots represent the average over animals

13 calculated from averages over trials for individual animals. Thick lines indicate the mean values

14 while shaded regions indicate SEM across animals. **(C)** Average distributions of glutamate signal

15 amplitudes in the AC-ROI (normalized to the percentage of occurrences). Glutamate signal

16 amplitude = (peak  $\Delta F/F_0$ ) – (mean of baseline). Shaded regions represent the SEM. **(D-E)** Bar

17 graphs show the mean  $\pm$  SEM values of glutamate signal amplitude peaks and time-to-peak

1 respectively. \*, \*\*, and \*\*\* indicate  $p < 0.05$ ,  $p < 0.01$ , and  $p < 0.001$  respectively for a repeated  
 2 measure ANOVA with post-hoc Tukey-Kramer correction.

3

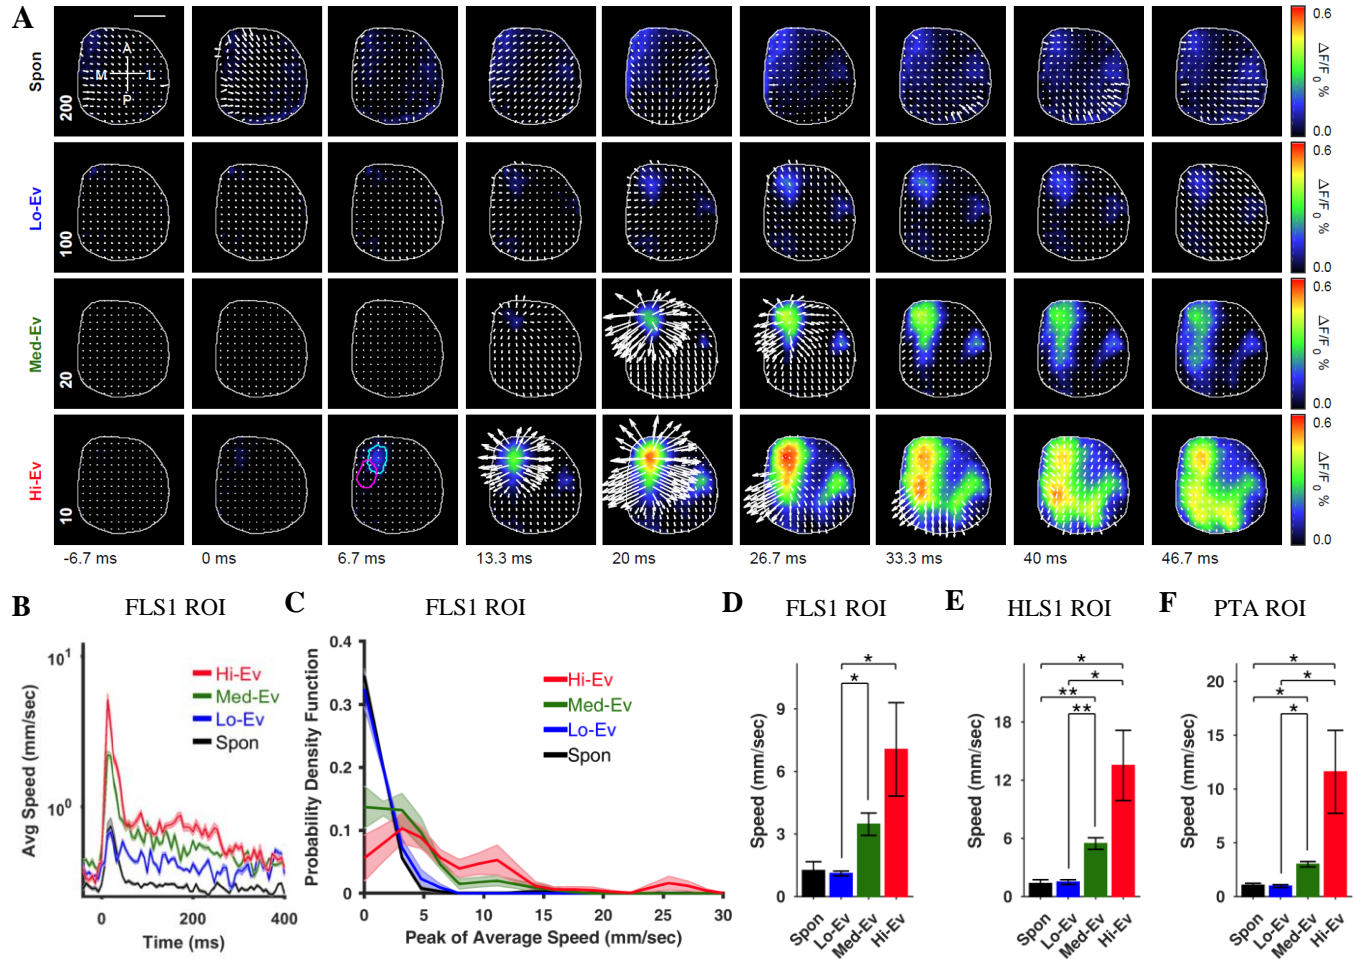

4

5 **Fig. 3 Propagation speed of forelimb-evoked activity is larger than that of spontaneous**

6 **activity in anesthetized mice. (A)** Montage of representative examples of motifs of forelimb

7 spontaneous (Spon) activity (top row) with overlaid velocity vector fields determined by optical

8 flow analysis. The bottom three rows show similar montages for average evoked (Ev) activity in

9 response to contralateral forelimb stimulation with low (Lo), medium (Med), and high (Hi) stimuli

10 strengths. Primary sensory forelimb (FLS1) and hindlimb (HLS1) ROIs are outlined in the third

11 column of the bottom row. Compass lines indicate anterior (A), posterior (P), medial (M) and

12 lateral (L) directions. Scale is 1 mm. Numbers in the first column indicate scale factor for drawing

13 velocity vector fields. **(B)** Plots of the average speed signal in the FLS1-ROI ( $n=5$  animals). Note

14 that the scale in the y axis is logarithmic. Shaded regions indicate SEM across animals. **(C)**

1 Average distributions of peak average speeds in the FLS1-ROI (normalized to the percentage of  
2 occurrences). Shaded regions represent the SEM across animals. **(D-E)**, and **(F)** Mean $\pm$ SEM  
3 values of peak from average speeds in the FLS1, HLS1, and PTA ROIs respectively. Note that  
4 different y-axis scales are used for each ROI. \* and \*\* indicate  $p < 0.05$  and  $p < 0.01$  respectively for  
5 a repeated measure ANOVA test with post-hoc Tukey-Kramer correction.

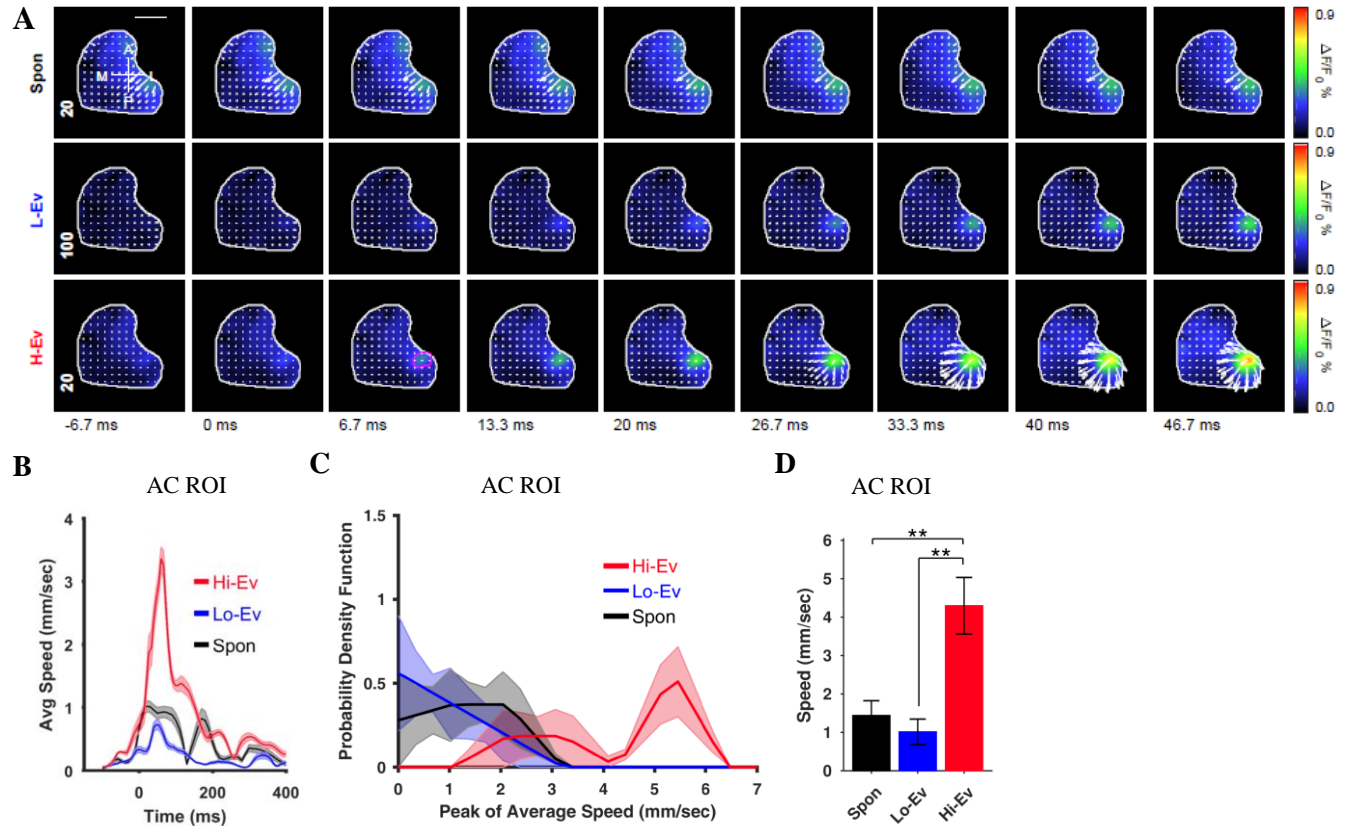

1  
2 **Fig. 4 Propagation speed of auditory tone-evoked and spontaneous activity in awake mice.**  
3 (A) Montages of representative examples of spontaneous (top row) and averaged evoked activity  
4 in response to auditory stimulation with low (Lo) and high (Hi) stimuli strengths (two bottom  
5 rows) with overlaid velocity vector fields determined by the optical flow analysis. Primary AC  
6 ROI is outlined in the third column of the bottom row. Compass lines indicate anterior (A),  
7 posterior (P), medial (M) and lateral (L) directions. Scale bar is 1 mm. Numbers in the first column  
8 indicate scale factor for drawing the velocity vector fields. (B) Plots of the average speed signal in  
9 the AC-ROI (n=5 animals). The lines represent the mean while shaded regions indicate the SEM  
10 across animals. (C) Average distributions of peak average speed in the AC-ROI from 5 animals  
11 (normalized to the percentage of occurrences). Shaded regions show the SEM across animals. (D)  
12 Mean±SEM values of peak of average speeds for the AC ROI. \*\* indicate  $p < 0.01$ , repeated  
13 measure ANOVA with post-hoc Tukey-Kramer correction.

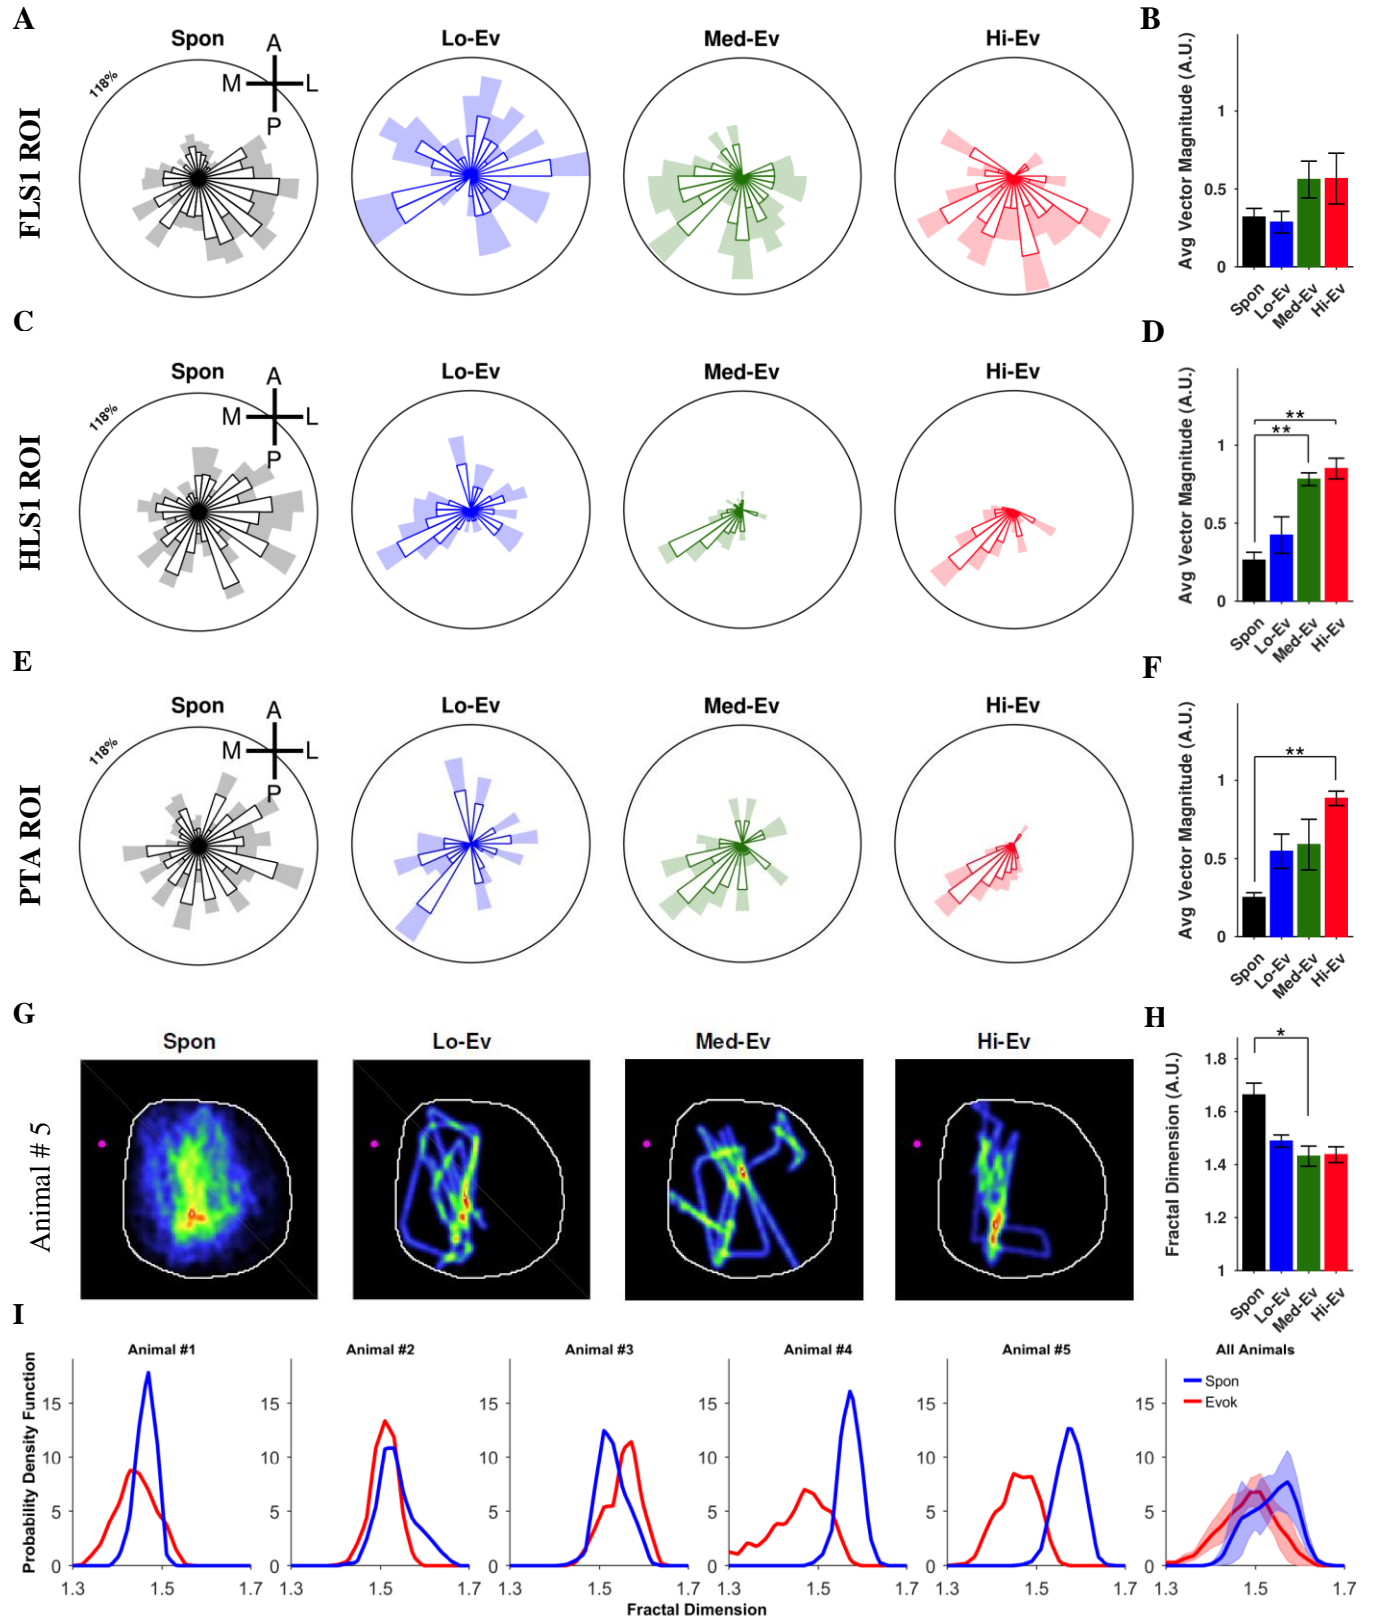

1



1 **Fig. 5 Propagation patterns of forelimb-evoked activity converge as stimulus levels increases**  
2 **and are less complex than those of spontaneous activity in anesthetized mice. (A)** Average  
3 distributions of directions of the peak velocity vectors in the FLS1 ROI for spontaneous (Spon)  
4 activity and evoked (Ev) activity elicited with Lo, Med, and Hi stimulus levels normalized to the  
5 percentage of occurrences across animals (n=5). **(B)** Magnitude of the average of normalized  
6 velocity vectors. **(C-D)** and **(E-F)** similar to **(A-B)** but for HLS1 and PTA ROIs respectively. **(G)**  
7 Normalized histogram of activity trajectories represented as a heat map with warm and cold colors  
8 indicating larger and smaller occurrences of activity passing through a given point on the cortical  
9 surface. **(H)** Mean $\pm$ SEM values of Hausdorff fractal dimension of heat maps. **(I)** Distributions of  
10 the Hausdorff fractal dimension for evoked and spontaneous activity for each animal and average  
11 for all animals (last column). \* and \*\* indicate p<0.05 and p<0.01 respectively, repeated measure  
12 ANOVA with post-hoc Tukey-Kramer correction.

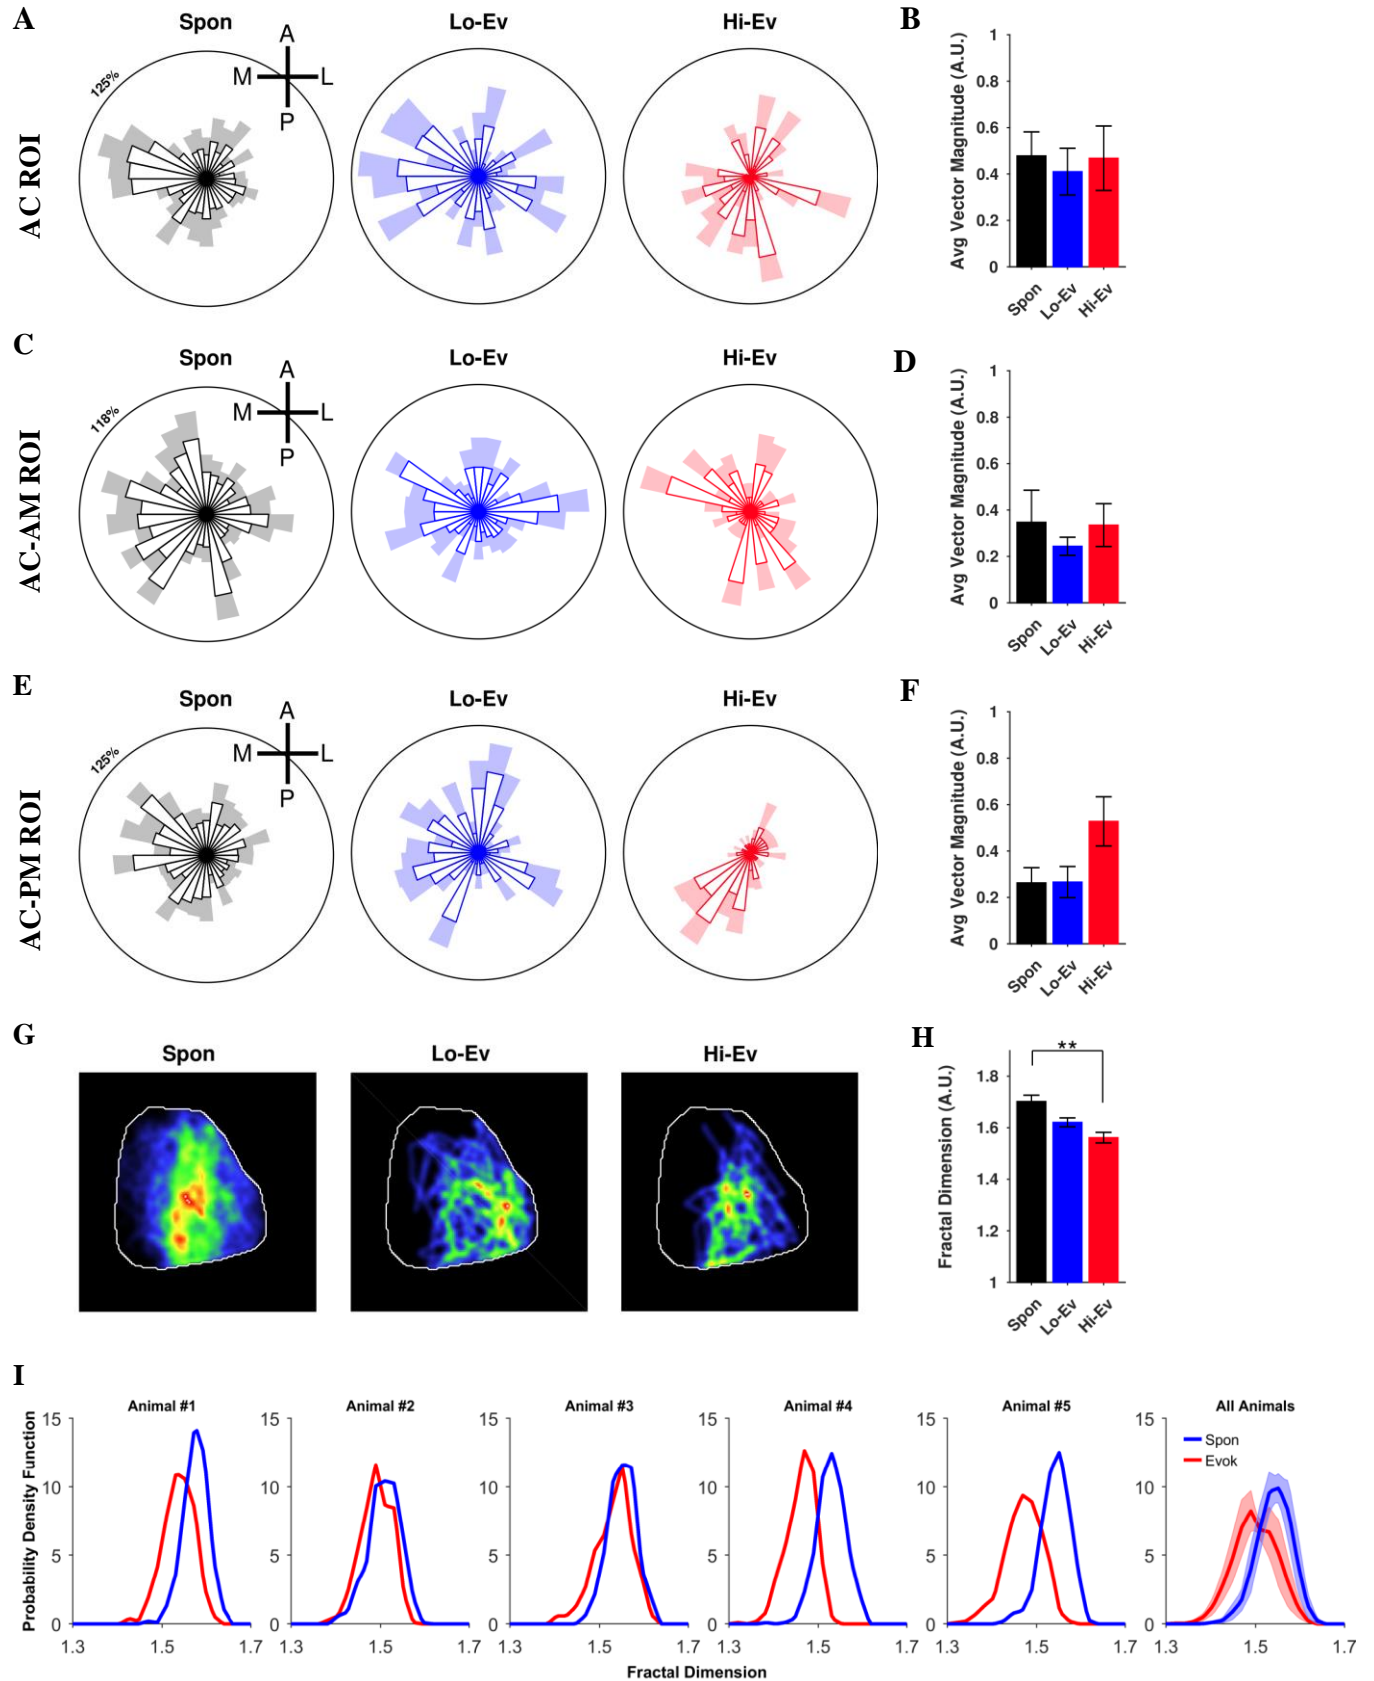

1 **Fig. 6 Propagation patterns of auditory tone-evoked activity converge with increasing**  
2 **stimulus levels and are less complex than those of spontaneous activity in awake mice. (A)**  
3 Average distributions of the directions of the peak velocity vectors in the AC ROI for spontaneous  
4 (Spon) activity and evoked (Ev) activity elicited with Lo and Hi stimulus levels normalized to the  
5 percentage of occurrences over animals (n=5). **(B)** Magnitude of the average of normalized  
6 velocity vectors. **(C and D)** and **(E and F)** similar to **(A and B)** but for AC-AM and AC-PM ROIs  
7 respectively. **(G)** Normalized histogram of activity trajectories represented as a heat map with  
8 warm and cold colors indicating larger and smaller occurrences of activity passing through a given  
9 point on the cortical surface. **(H)** Bar plot of the mean $\pm$ SEM of the Hausdorff fractal dimension of  
10 the heat maps. **(I)** Distributions of the Hausdorff fractal dimension for evoked and spontaneous  
11 activity for each animal and average for all animals (last column). \*\* indicates  $p < 0.01$ , repeated  
12 measure ANOVA with post-hoc Tukey-Kramer correction.  
13

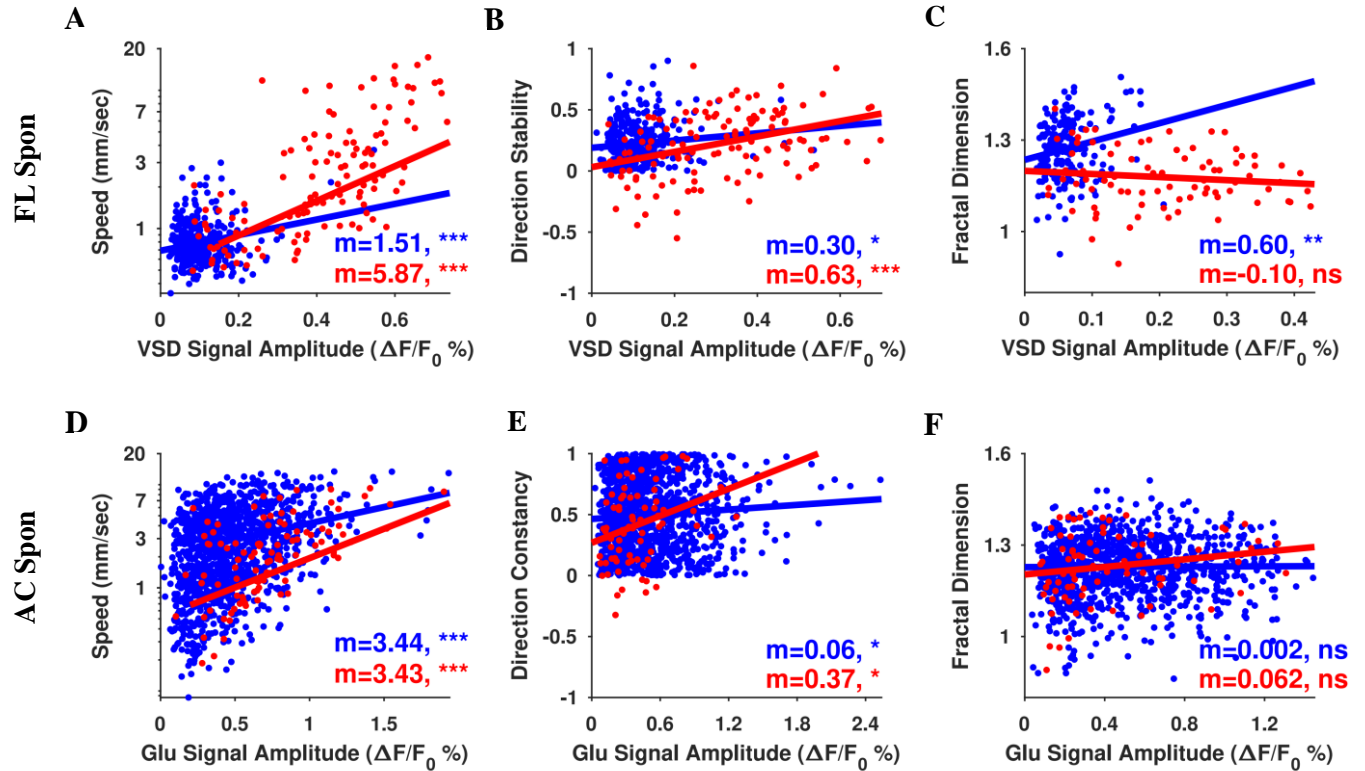

1  
2 **Fig. 7 Speed, flow direction stability, and fractal dimension of the propagation of**  
3 **spontaneous and evoked activity are positively correlated with its amplitude in awake and**  
4 **anaesthetized mice. (A)** Scatter plot of VSD signal amplitudes for forelimb spontaneous motifs  
5 (blue) and evoked (red) activity versus peak velocity vectors in the FLS1 ROI for anaesthetized  
6 mice. Each dot represents one trial. The data is pooled from all animals (n=5). The lines represent  
7 linear regression models fitted to the corresponding data. **(B)** Scatter plot and linear regression fit  
8 for VSD signal amplitude for forelimb spontaneous (blue) motifs and evoked activity (red) in the  
9 HLS1 ROI vs flow direction stability for anesthetized mice. **(C)** Similar to **(A)** but for VSD signal  
10 amplitudes in the entire imaging window vs fractal dimensions of spontaneous motifs (blue) and  
11 evoked activity (red). **(D-F)** Similar to **(A-C)** but for auditory spontaneous motifs (blue) and  
12 evoked activity in AC in awake mice. The data is pooled from all animals (n=5). m is the estimated  
13 slope. \*, \*\*, and \*\*\* indicates  $p < 0.05$ ,  $p < 0.01$ , and  $p < 0.001$  respectively, for the p-value of the  
14 linear regression slope. Note that speed axis in **A** and **D** is logarithmic scale.

15
